# Supplementary material for: Molecular Evolution of the TET Gene Family in Mammals
Source: PubMed Central journal article supplement (PMC4691057; doi:10.3390/ijms161226110), 2015-12-01
Supplement: ijms-16-26110-s001.pdf [file ijms-16-26110-s001.pdf]

# Supplementary Materials: Molecular Evolution of the TET Gene Family in Mammals

Hirohichi Akahori, Stéphane Guindon, Sumio Yoshizaki and Yoshinori Muto

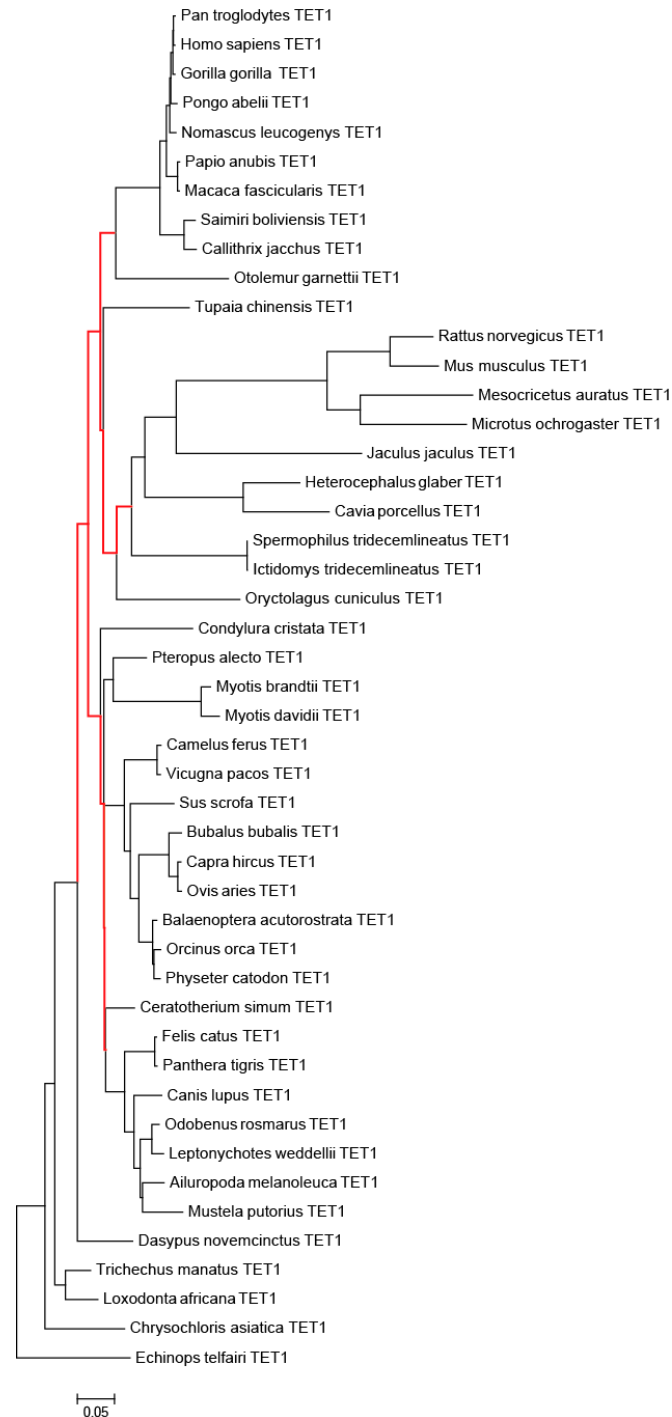

**Figure S1.** Maximum-likelihood tree of the TET1 genes. The tree was constructed using PhyML v3.0 software, based on the nucleotide-coding sequences. Branches with the number of sites under positive selection ( $\omega_3 = 1.34$ ) greater than the 90th percentile in the Fitmodel analysis (Figure S4) are shown in red.

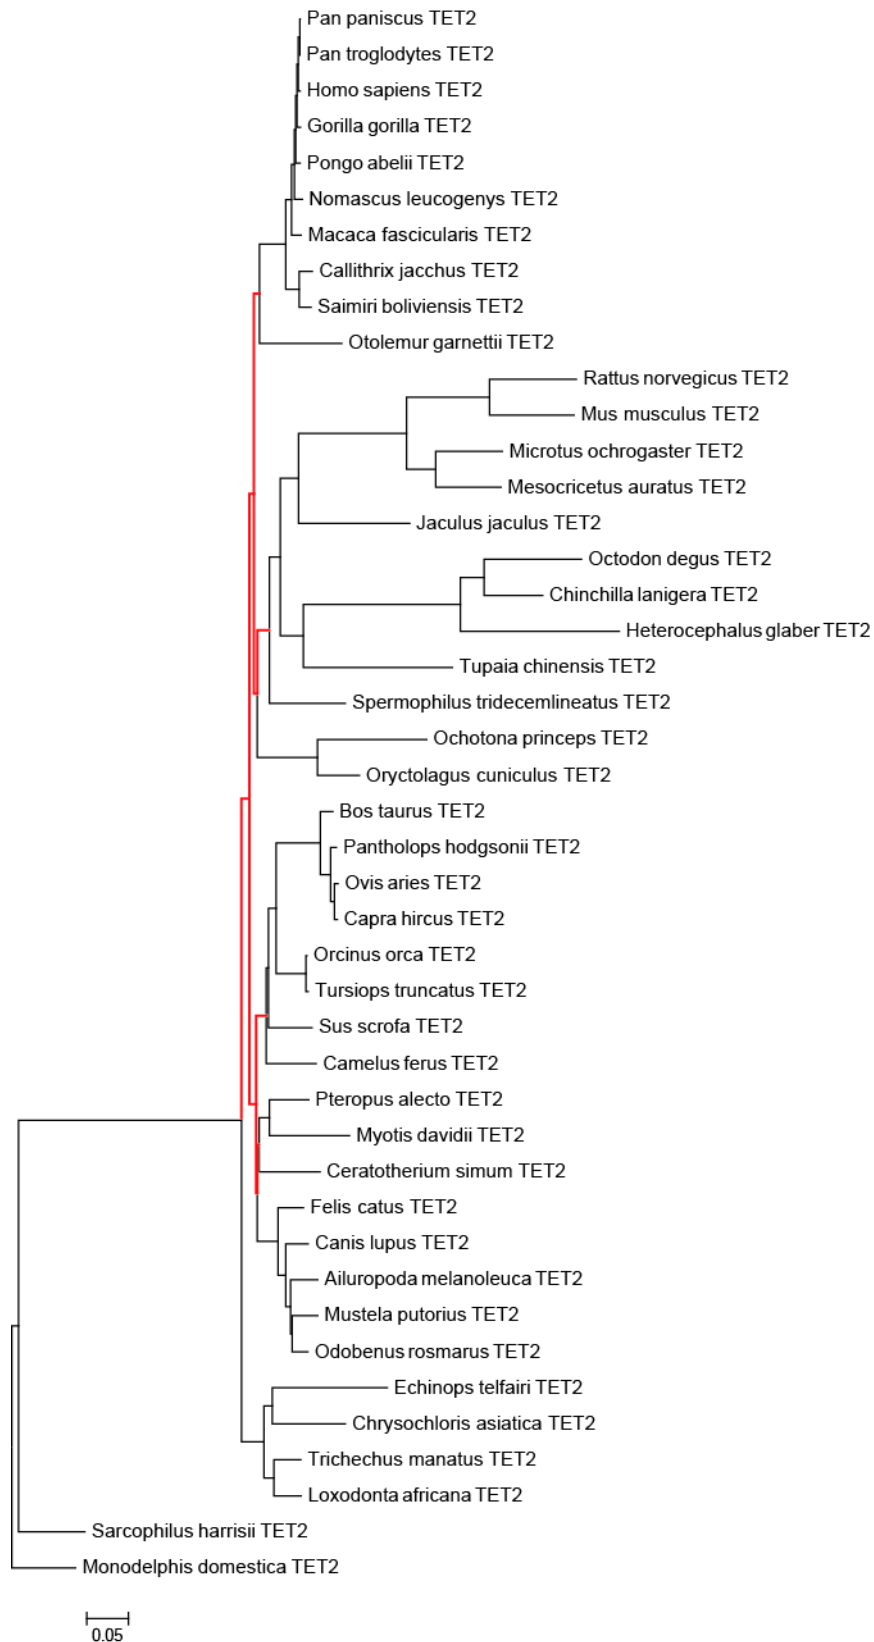

**Figure S2.** Maximum-likelihood tree of the TET2 genes. The tree was constructed using PhyML v3.0 software, based on the nucleotide-coding sequences. Branches with the number of sites under positive selection ( $\omega_3 = 1.54$ ) greater than 90th percentile in the Fitmodel analysis (Figure S4) are shown in red.

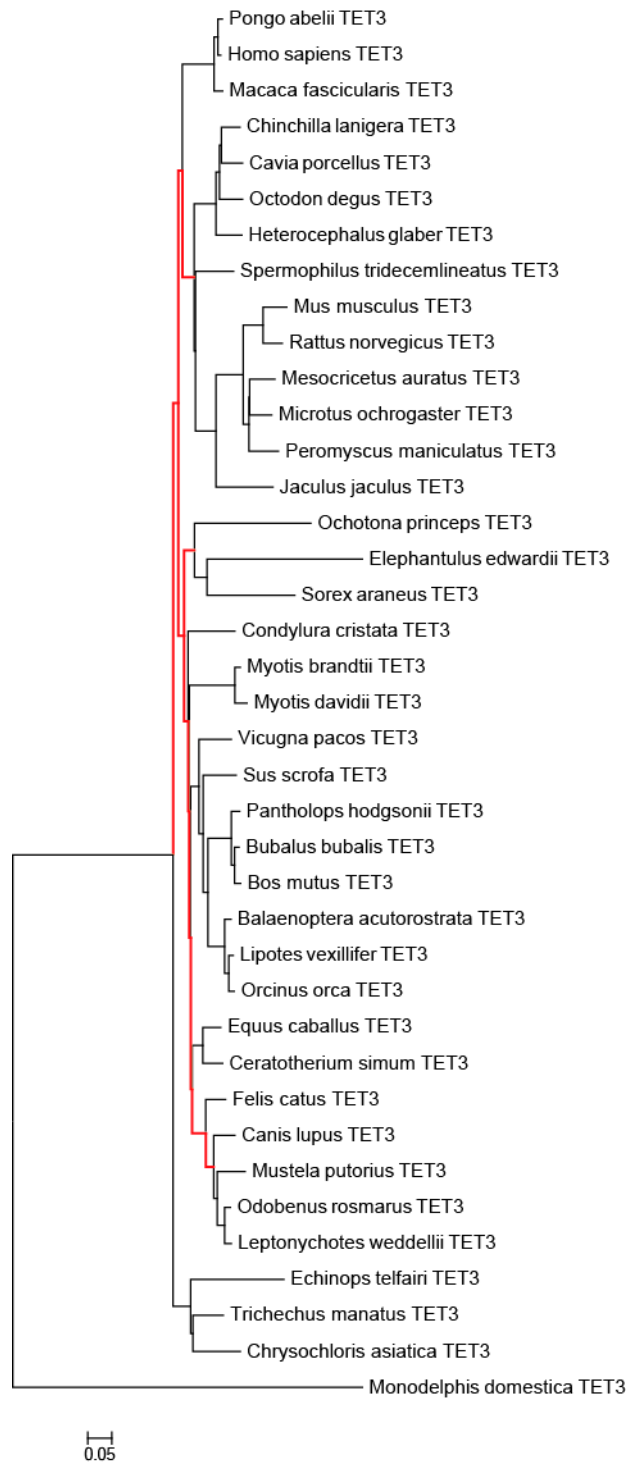

**Figure S3.** Maximum-likelihood tree of the TET3 genes. The tree was constructed using PhyML v3.0 software, based on the nucleotide-coding sequences. Branches with the number of sites under relaxed selection ( $\omega_3 = 1.07$ ) greater than the 90th percentile in the Fitmodel analysis (Figure S4) are shown in red.

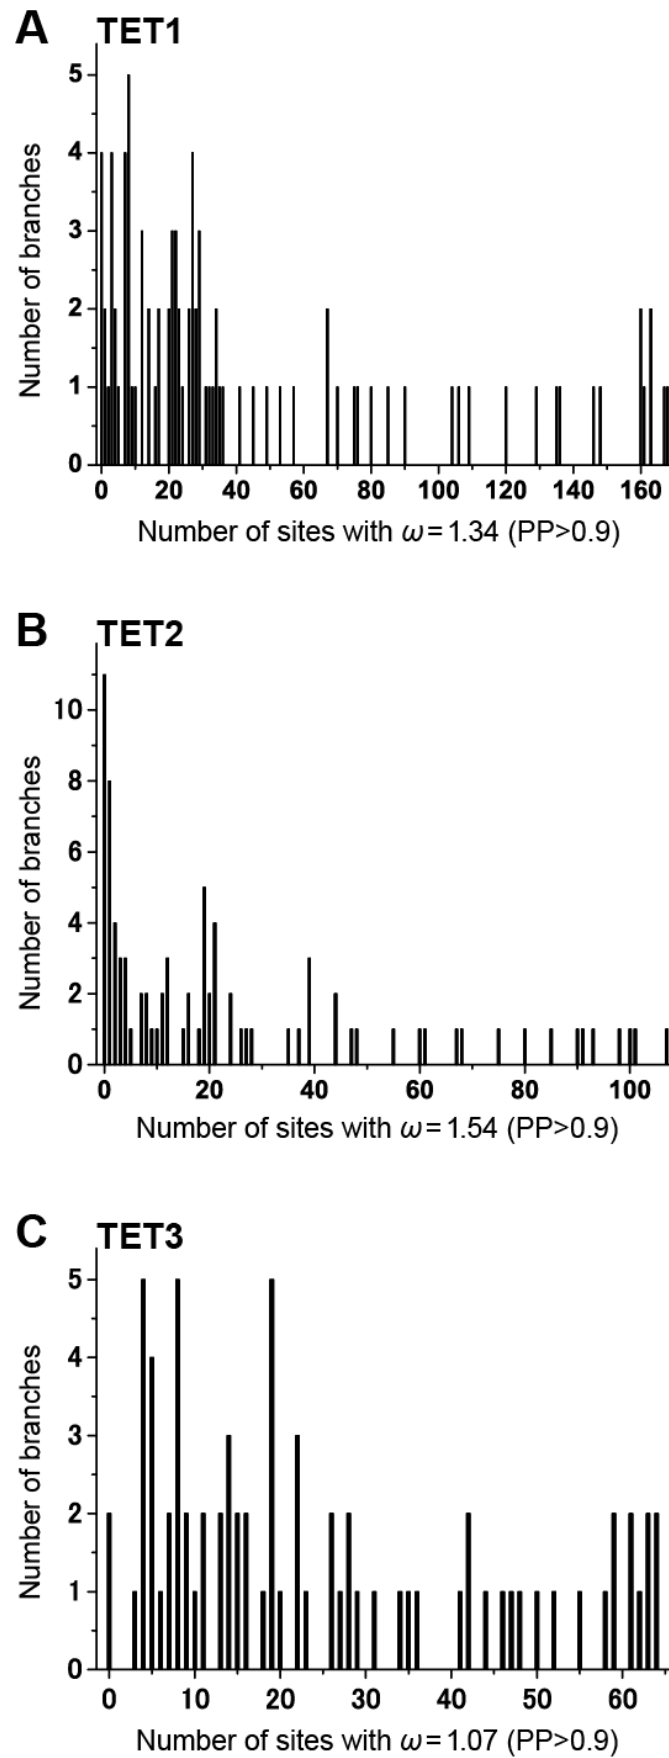

**Figure S4.** Distribution of branches with different numbers of sites under the  $\omega_3$  rate ratio class across TET1 (A), TET2 (B) and TET3 (C) gene trees. The  $x$ -axis represents the number of sites with the  $\omega_3$  rate ratio class; the  $y$ -axis represents the number of branches.



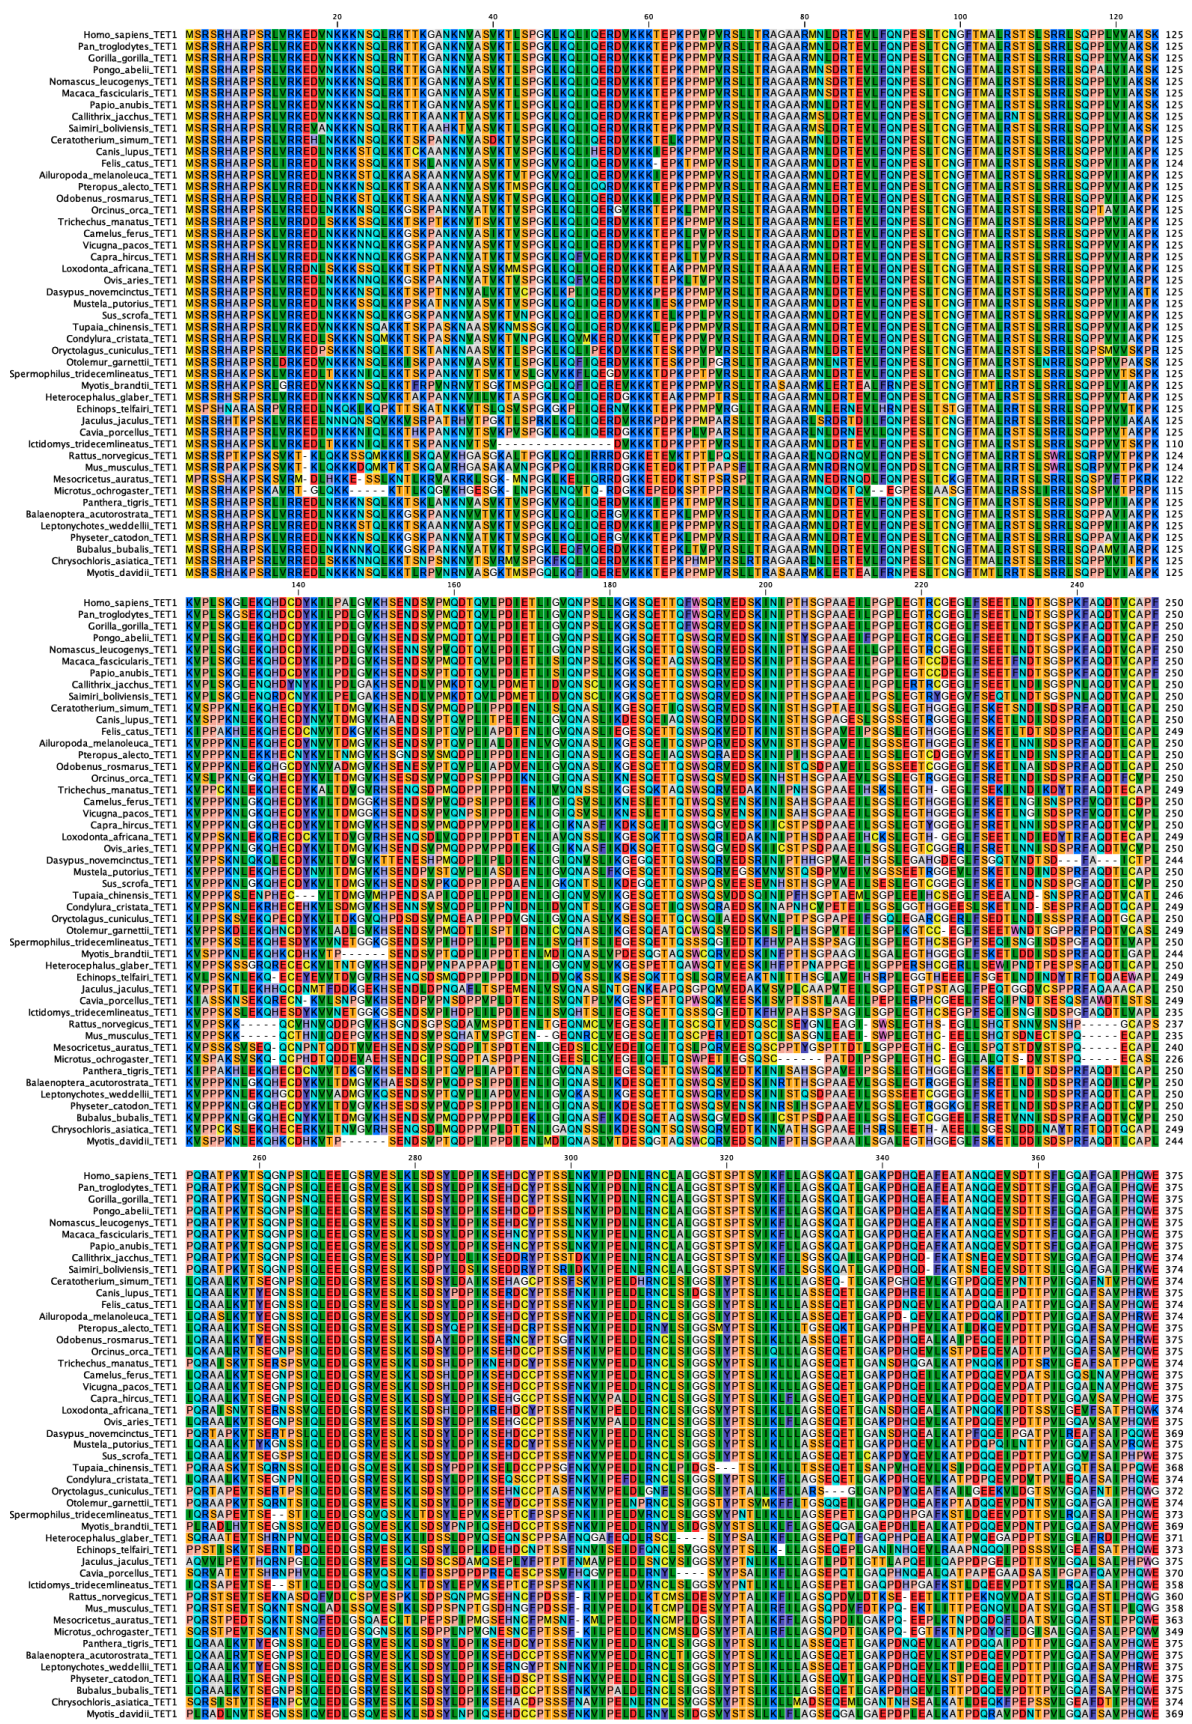

Figure S5. Cont.











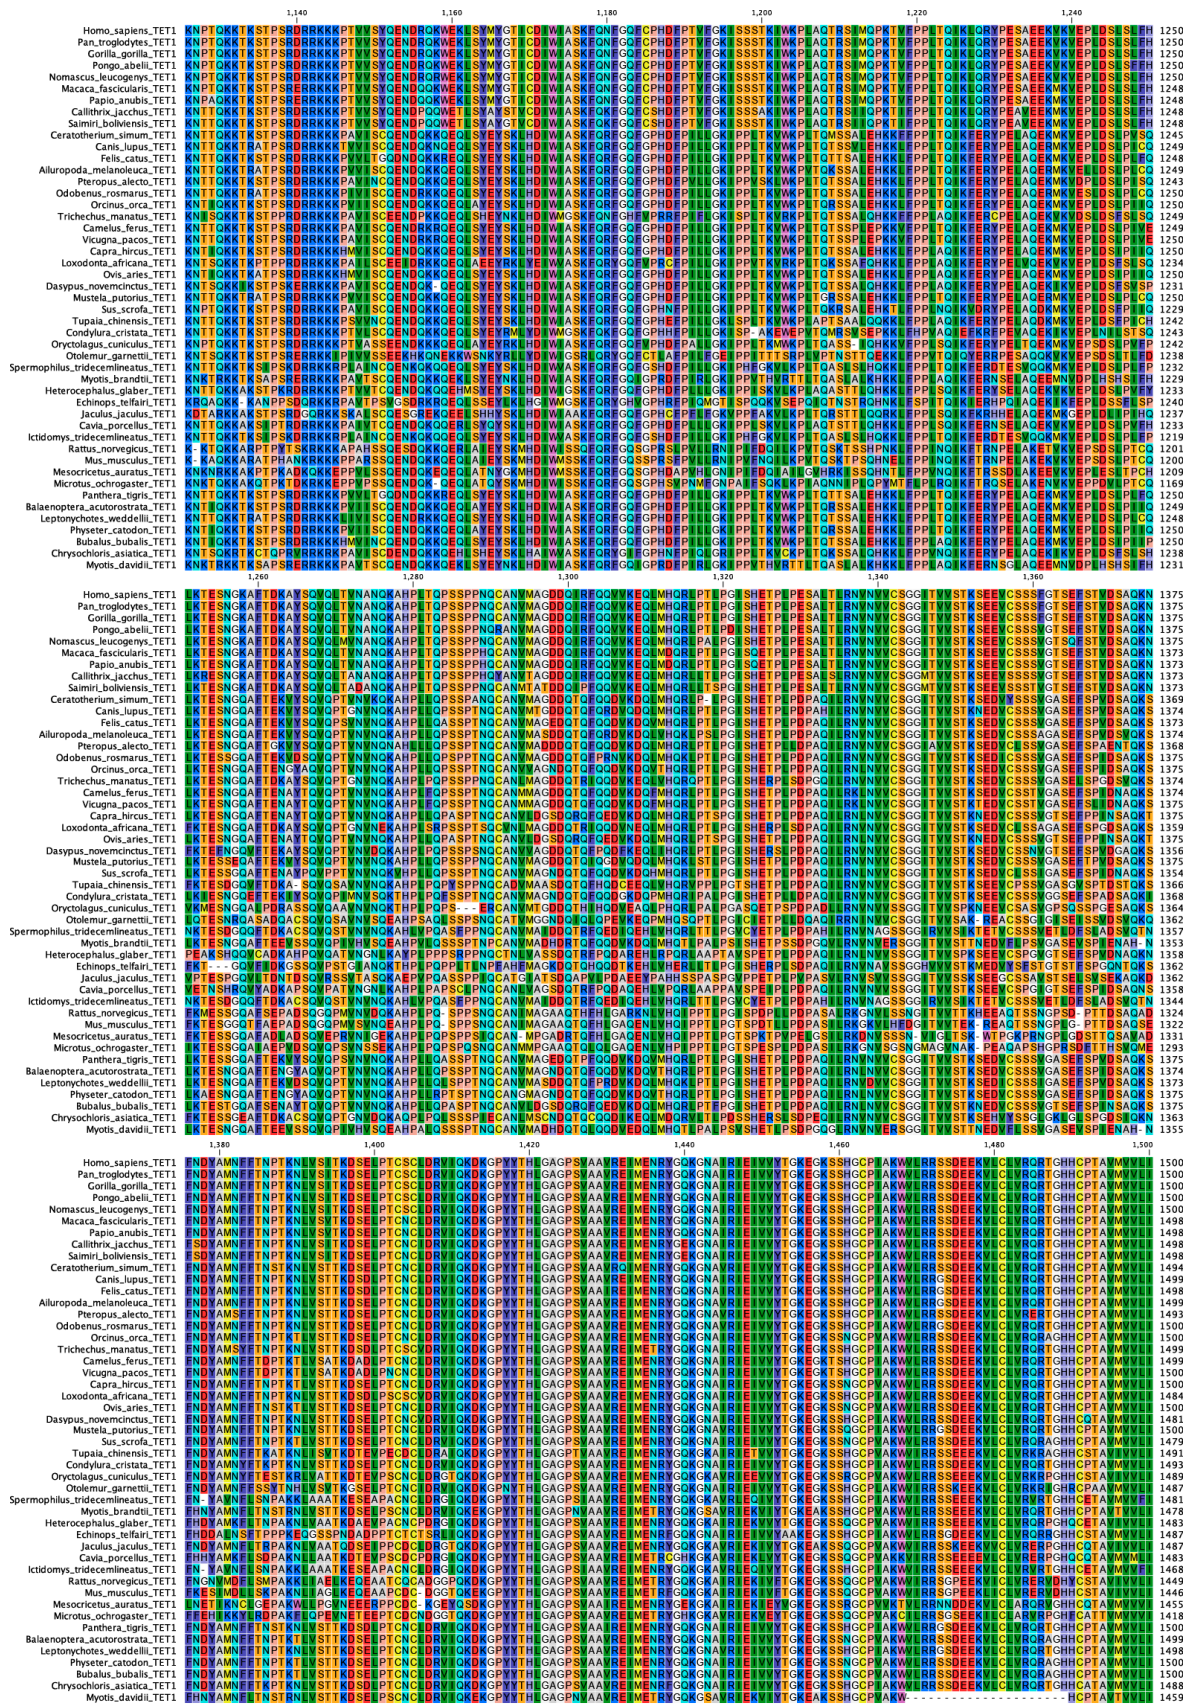

Figure S5. Cont.



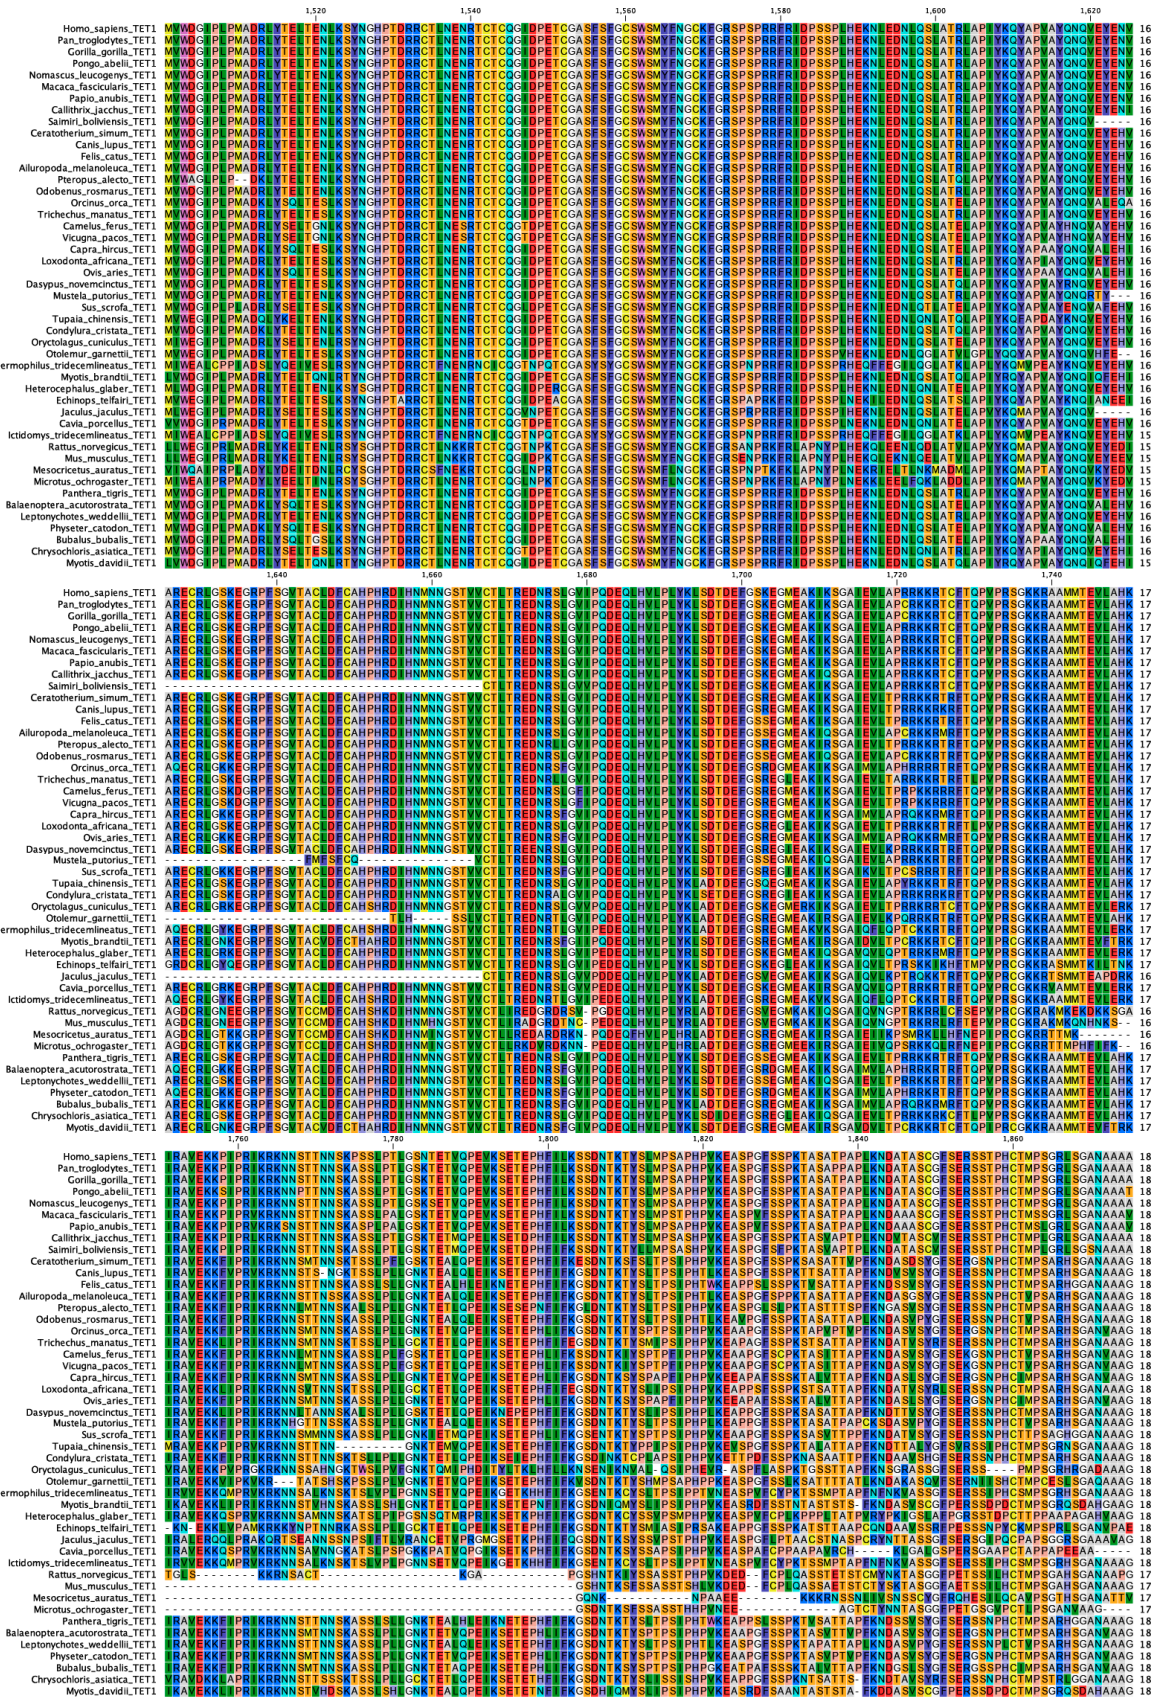

Figure S5. Cont.



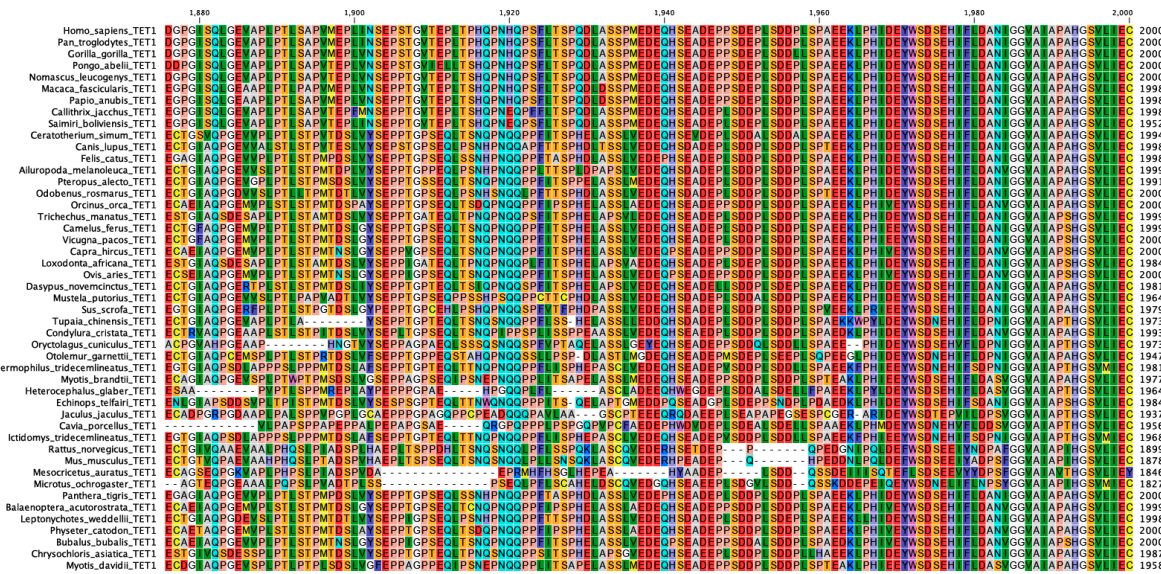

**Figure S5.** Multiple amino acid sequence alignment of mammalian TET1 genes. Amino acid sequences were aligned using MAFFT software with parameter settings optimized for the iterative refinement method (FFT-NS-i). The resulting multiple sequence alignment was trimmed by removing poorly aligned regions, using trimAl 1.2.

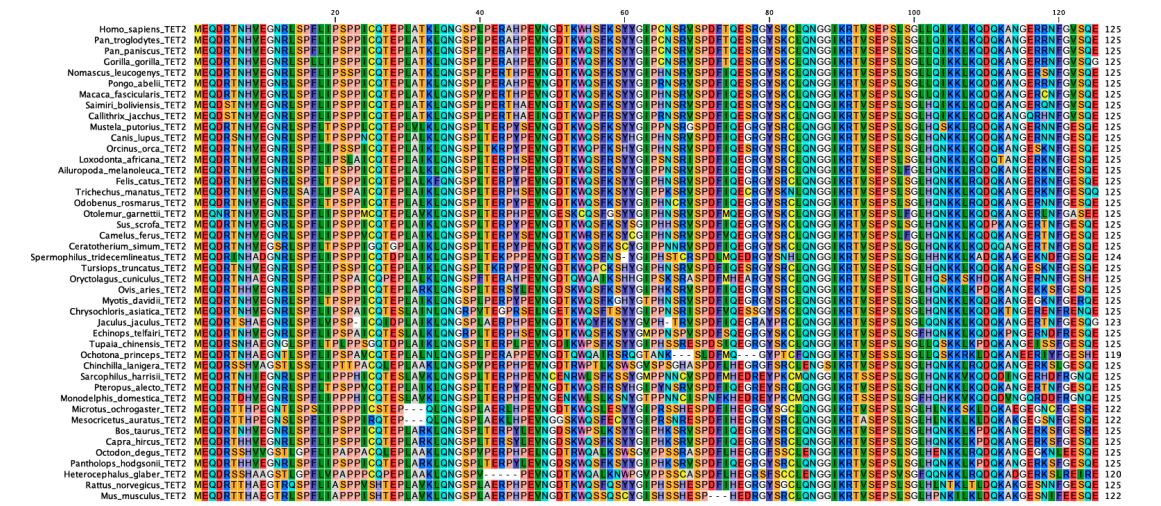

**Figure S6. Cont.**



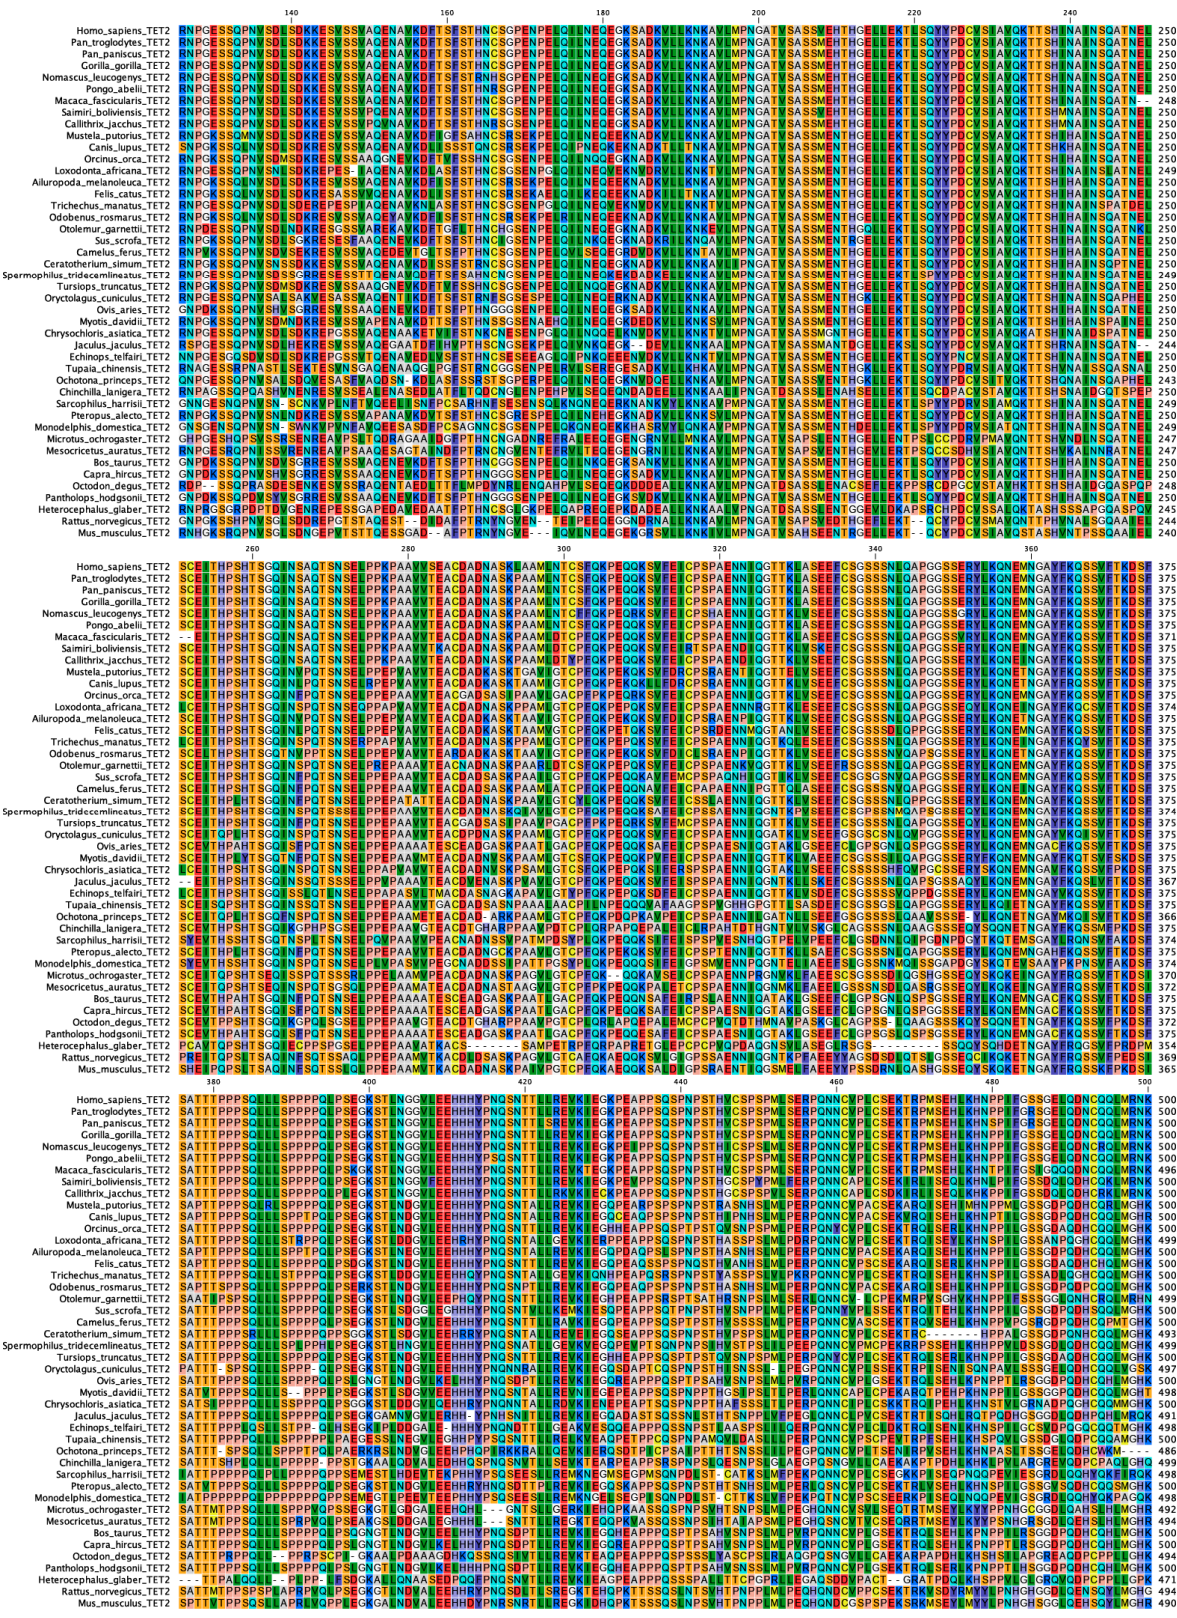

Figure S6. Cont.



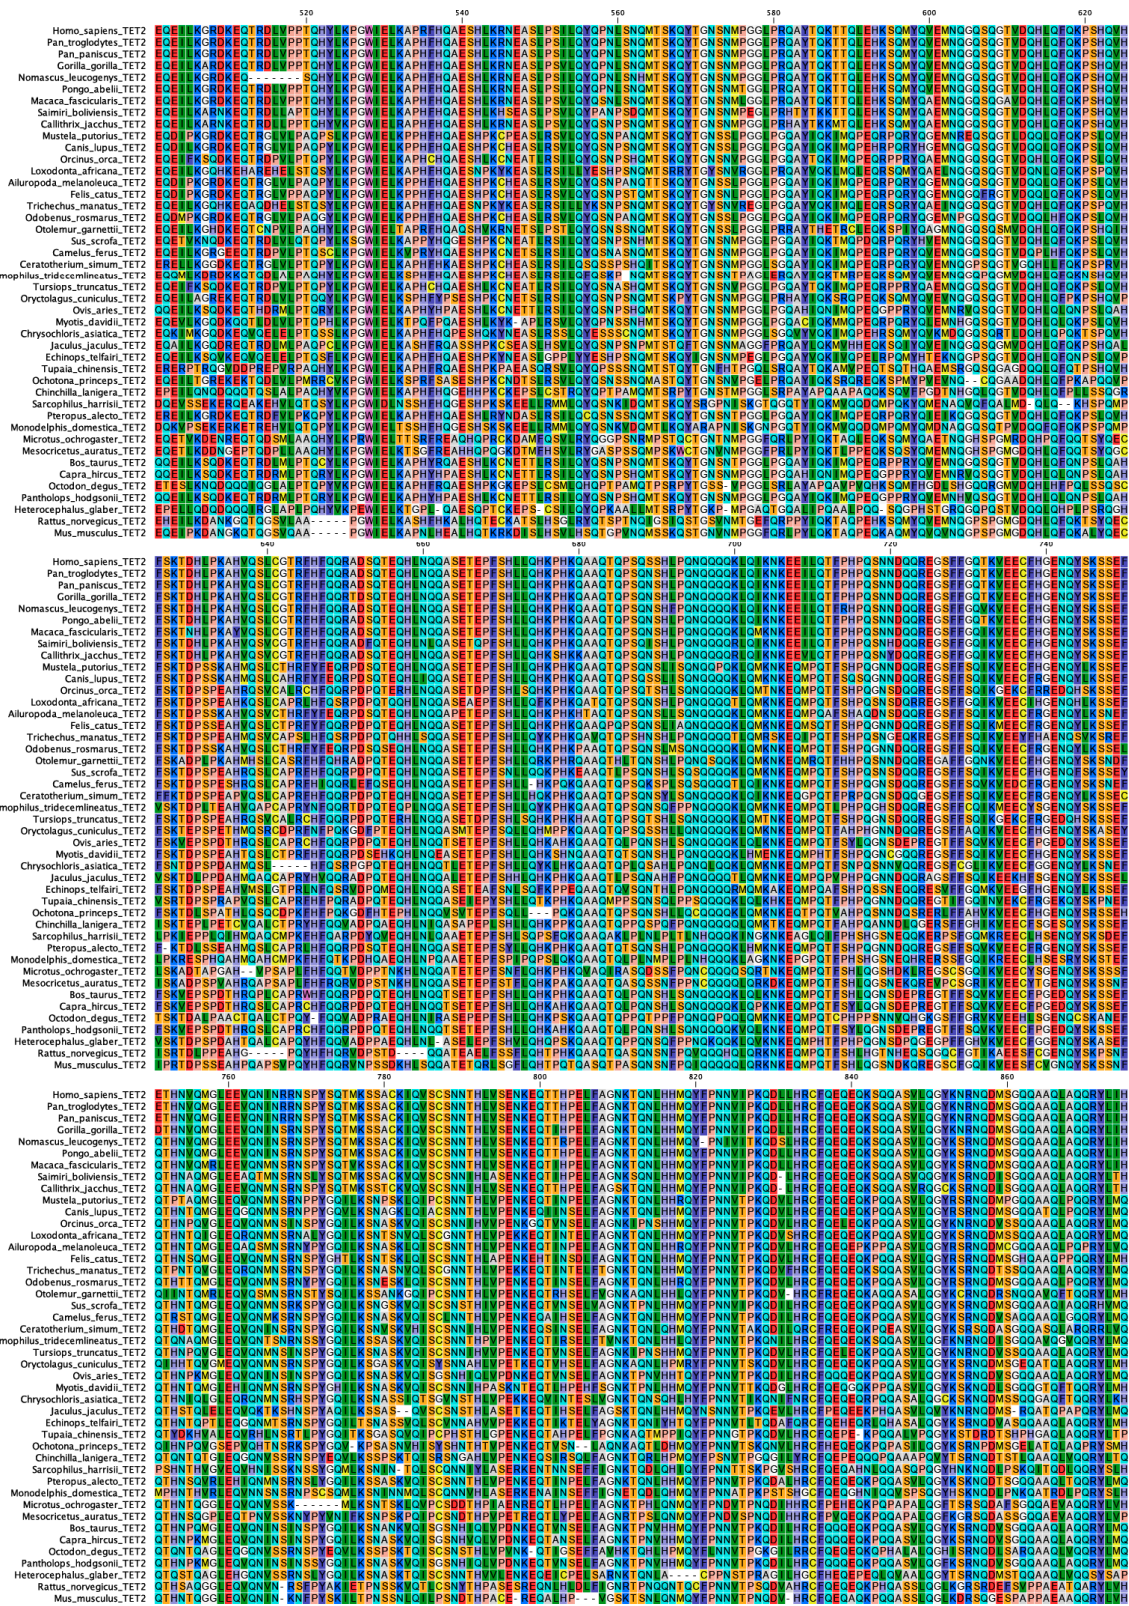

Figure S6. Cont.







|                                    | 1,260  | 1,280    | 1,300  | 1,320 | 1,340 | 1,360 |          |        |      |      |     |     |    |         |      |     |    |        |     |       |    |    |      |      |
|------------------------------------|--------|----------|--------|-------|-------|-------|----------|--------|------|------|-----|-----|----|---------|------|-----|----|--------|-----|-------|----|----|------|------|
| Homio_sapiens_TET2                 | PRRKEK | GDGPEEKK | ESHQNI | ST    | MAPT  | YKKA  | APDAFNNQ | VEYHAP | CRGK | GRPS | SGT | ACD | FC | CAHARRD | HNMG | SGT | CT | ITREDR | GGP | PEDEQ | HP | PK | SDVE | 1375 |
| Pan_troglodytes_TET2               | PRRKEK | GDGPEEKK | ESHQNI | ST    | MAPT  | YKKA  | APDAFNNQ | VEYHAP | CRGK | GRPS | SGT | ACD | FC | CAHARRD | HNMG | SGT | CT | ITREDR | GGP | PEDEQ | HP | PK | SDVE | 1375 |
| Pan_paniscus_TET2                  | PRRKEK | GDGPEEKK | ESHQNI | ST    | MAPT  | YKKA  | APDAFNNQ | VEYHAP | CRGK | GRPS | SGT | ACD | FC | CAHARRD | HNMG | SGT | CT | ITREDR | GGP | PEDEQ | HP | PK | SDVE | 1375 |
| Gorilla_gorilla_TET2               | PRRKEK | GDGPEEKK | ESHQNI | ST    | MAPT  | YKKA  | APDAFNNQ | VEYHAP | CRGK | GRPS | SGT | ACD | FC | CAHARRD | HNMG | SGT | CT | ITREDR | GGP | PEDEQ | HP | PK | SDVE | 1375 |
| Nomascus_kuoyingensis_TET2         | PRRKEK | GDGPEEKK | ESHQNI | ST    | MAPT  | YKKA  | APDAFNNQ | VEYHAP | CRGK | GRPS | SGT | ACD | FC | CAHARRD | HNMG | SGT | CT | ITREDR | GGP | PEDEQ | HP | PK | SDVE | 1375 |
| Pongo_abelii_TET2                  | PRRKEK | GDGPEEKK | ESHQNI | ST    | MAPT  | YKKA  | APDAFNNQ | VEYHAP | CRGK | GRPS | SGT | ACD | FC | CAHARRD | HNMG | SGT | CT | ITREDR | GGP | PEDEQ | HP | PK | SDVE | 1375 |
| Macaca_fascicularis_TET2           | PRRKEK | GDGPEEKK | ESHQNI | ST    | MAPT  | YKKA  | APDAFNNQ | VEYHAP | CRGK | GRPS | SGT | ACD | FC | CAHARRD | HNMG | SGT | CT | ITREDR | GGP | PEDEQ | HP | PK | SDVE | 1371 |
| Saimiri_boliviensis_TET2           | PRRKEK | GDGPEEKK | ESHQNI | ST    | MAPT  | YKKA  | APDAFNNQ | VEYHAP | CRGK | GRPS | SGT | ACD | FC | CAHARRD | HNMG | SGT | CT | ITREDR | GGP | PEDEQ | HP | PK | SDVE | 1374 |
| Callithrix_jacchus_TET2            | PRRKEK | GDGPEEKK | ESHQNI | ST    | MAPT  | YKKA  | APDAFNNQ | VEYHAP | CRGK | GRPS | SGT | ACD | FC | CAHARRD | HNMG | SGT | CT | ITREDR | GGP | PEDEQ | HP | PK | SDVE | 1374 |
| Mustela_putorius_TET2              | PRRKEK | GDGPEEKK | ESHQNI | ST    | MAPT  | YKKA  | APDAFNNQ | VEYHAP | CRGK | GRPS | SGT | ACD | FC | CAHARRD | HNMG | SGT | CT | ITREDR | GGP | PEDEQ | HP | PK | SDVE | 1375 |
| Canis_lupus_TET2                   | PRRKEK | GDGPEEKK | ESHQNI | ST    | MAPT  | YKKA  | APDAFNNQ | VEYHAP | CRGK | GRPS | SGT | ACD | FC | CAHARRD | HNMG | SGT | CT | ITREDR | GGP | PEDEQ | HP | PK | SDVE | 1375 |
| Orcinus_orca_TET2                  | PRRKEK | GDGPEEKK | ESHQNI | ST    | MAPT  | YKKA  | APDAFNNQ | VEYHAP | CRGK | GRPS | SGT | ACD | FC | CAHARRD | HNMG | SGT | CT | ITREDR | GGP | PEDEQ | HP | PK | SDVE | 1375 |
| Loxodonta_africana_TET2            | PRRKEK | GDGPEEKK | ESHQNI | ST    | MAPT  | YKKA  | APDAFNNQ | VEYHAP | CRGK | GRPS | SGT | ACD | FC | CAHARRD | HNMG | SGT | CT | ITREDR | GGP | PEDEQ | HP | PK | SDVE | 1374 |
| Alloropoda_melanoleuca_TET2        | PRRKEK | GDGPEEKK | ESHQNI | ST    | MAPT  | YKKA  | APDAFNNQ | VEYHAP | CRGK | GRPS | SGT | ACD | FC | CAHARRD | HNMG | SGT | CT | ITREDR | GGP | PEDEQ | HP | PK | SDVE | 1375 |
| Felis_catus_TET2                   | PRRKEK | GDGPEEKK | ESHQNI | ST    | MAPT  | YKKA  | APDAFNNQ | VEYHAP | CRGK | GRPS | SGT | ACD | FC | CAHARRD | HNMG | SGT | CT | ITREDR | GGP | PEDEQ | HP | PK | SDVE | 1375 |
| Trichechus_manatus_TET2            | PRRKEK | GDGPEEKK | ESHQNI | ST    | MAPT  | YKKA  | APDAFNNQ | VEYHAP | CRGK | GRPS | SGT | ACD | FC | CAHARRD | HNMG | SGT | CT | ITREDR | GGP | PEDEQ | HP | PK | SDVE | 1375 |
| Odobenus_rossmarus_TET2            | PRRKEK | GDGPEEKK | ESHQNI | ST    | MAPT  | YKKA  | APDAFNNQ | VEYHAP | CRGK | GRPS | SGT | ACD | FC | CAHARRD | HNMG | SGT | CT | ITREDR | GGP | PEDEQ | HP | PK | SDVE | 1375 |
| Otlemur_garnettii_TET2             | PRRKEK | GDGPEEKK | ESHQNI | ST    | MAPT  | YKKA  | APDAFNNQ | VEYHAP | CRGK | GRPS | SGT | ACD | FC | CAHARRD | HNMG | SGT | CT | ITREDR | GGP | PEDEQ | HP | PK | SDVE | 1373 |
| Sus_scrofa_TET2                    | PRRKEK | GDGPEEKK | ESHQNI | ST    | MAPT  | YKKA  | APDAFNNQ | VEYHAP | CRGK | GRPS | SGT | ACD | FC | CAHARRD | HNMG | SGT | CT | ITREDR | GGP | PEDEQ | HP | PK | SDVE | 1375 |
| Camelus_ferus_TET2                 | PRRKEK | GDGPEEKK | ESHQNI | ST    | MAPT  | YKKA  | APDAFNNQ | VEYHAP | CRGK | GRPS | SGT | ACD | FC | CAHARRD | HNMG | SGT | CT | ITREDR | GGP | PEDEQ | HP | PK | SDVE | 1374 |
| Ceratherium_simum_TET2             | PRRKEK | GDGPEEKK | ESHQNI | ST    | MAPT  | YKKA  | APDAFNNQ | VEYHAP | CRGK | GRPS | SGT | ACD | FC | CAHARRD | HNMG | SGT | CT | ITREDR | GGP | PEDEQ | HP | PK | SDVE | 1368 |
| Spermophilus_tridecemlineatus_TET2 | PRRKEK | GDGPEEKK | ESHQNI | ST    | MAPT  | YKKA  | APDAFNNQ | VEYHAP | CRGK | GRPS | SGT | ACD | FC | CAHARRD | HNMG | SGT | CT | ITREDR | GGP | PEDEQ | HP | PK | SDVE | 1373 |
| Tursiops_truncatus_TET2            | PRRKEK | GDGPEEKK | ESHQNI | ST    | MAPT  | YKKA  | APDAFNNQ | VEYHAP | CRGK | GRPS | SGT | ACD | FC | CAHARRD | HNMG | SGT | CT | ITREDR | GGP | PEDEQ | HP | PK | SDVE | 1375 |
| Oryctolagus_cuniculus_TET2         | PRRKEK | GDGPEEKK | ESHQNI | ST    | MAPT  | YKKA  | APDAFNNQ | VEYHAP | CRGK | GRPS | SGT | ACD | FC | CAHARRD | HNMG | SGT | CT | ITREDR | GGP | PEDEQ | HP | PK | SDVE | 1372 |
| Ovis_aries_TET2                    | PRRKEK | GDGPEEKK | ESHQNI | ST    | MAPT  | YKKA  | APDAFNNQ | VEYHAP | CRGK | GRPS | SGT | ACD | FC | CAHARRD | HNMG | SGT | CT | ITREDR | GGP | PEDEQ | HP | PK | SDVE | 1375 |
| Myotis_davidi_TET2                 | PRRKEK | GDGPEEKK | ESHQNI | ST    | MAPT  | YKKA  | APDAFNNQ | VEYHAP | CRGK | GRPS | SGT | ACD | FC | CAHARRD | HNMG | SGT | CT | ITREDR | GGP | PEDEQ | HP | PK | SDVE | 1330 |
| Chrysochloris_asiatia_TET2         | PRRKEK | GDGPEEKK | ESHQNI | ST    | MAPT  | YKKA  | APDAFNNQ | VEYHAP | CRGK | GRPS | SGT | ACD | FC | CAHARRD | HNMG | SGT | CT | ITREDR | GGP | PEDEQ | HP | PK | SDVE | 1370 |
| Jaculus_jaculus_TET2               | PRRKEK | GDGPEEKK | ESHQNI | ST    | MAPT  | YKKA  | APDAFNNQ | VEYHAP | CRGK | GRPS | SGT | ACD | FC | CAHARRD | HNMG | SGT | CT | ITREDR | GGP | PEDEQ | HP | PK | SDVE | 1360 |
| Echinops_tefairi_TET2              | PRRKEK | GDGPEEKK | ESHQNI | ST    | MAPT  | YKKA  | APDAFNNQ | VEYHAP | CRGK | GRPS | SGT | ACD | FC | CAHARRD | HNMG | SGT | CT | ITREDR | GGP | PEDEQ | HP | PK | SDVE | 1374 |
| Tupaia_chinensis_TET2              | PRRKEK | GDGPEEKK | ESHQNI | ST    | MAPT  | YKKA  | APDAFNNQ | VEYHAP | CRGK | GRPS | SGT | ACD | FC | CAHARRD | HNMG | SGT | CT | ITREDR | GGP | PEDEQ | HP | PK | SDVE | 1374 |
| Ochotona_princeps_TET2             | PRRKEK | GDGPEEKK | ESHQNI | ST    | MAPT  | YKKA  | APDAFNNQ | VEYHAP | CRGK | GRPS | SGT | ACD | FC | CAHARRD | HNMG | SGT | CT | ITREDR | GGP | PEDEQ | HP | PK | SDVE | 1353 |
| Chinchilla_lanigera_TET2           | PRRKEK | GDGPEEKK | ESHQNI | ST    | MAPT  | YKKA  | APDAFNNQ | VEYHAP | CRGK | GRPS | SGT | ACD | FC | CAHARRD | HNMG | SGT | CT | ITREDR | GGP | PEDEQ | HP | PK | SDVE | 1374 |
| Sarcophilus_harrisii_TET2          | PRRKEK | GDGPEEKK | ESHQNI | ST    | MAPT  | YKKA  | APDAFNNQ | VEYHAP | CRGK | GRPS | SGT | ACD | FC | CAHARRD | HNMG | SGT | CT | ITREDR | GGP | PEDEQ | HP | PK | SDVE | 1369 |
| Pteropus_allecto_TET2              | PRRKEK | GDGPEEKK | ESHQNI | ST    | MAPT  | YKKA  | APDAFNNQ | VEYHAP | CRGK | GRPS | SGT | ACD | FC | CAHARRD | HNMG | SGT | CT | ITREDR | GGP | PEDEQ | HP | PK | SDVE | 1375 |
| Monodelphis_domestica_TET2         | PRRKEK | GDGPEEKK | ESHQNI | ST    | MAPT  | YKKA  | APDAFNNQ | VEYHAP | CRGK | GRPS | SGT | ACD | FC | CAHARRD | HNMG | SGT | CT | ITREDR | GGP | PEDEQ | HP | PK | SDVE | 1373 |
| Microtus_ochrogaster_TET2          | PRRKEK | GDGPEEKK | ESHQNI | ST    | MAPT  | YKKA  | APDAFNNQ | VEYHAP | CRGK | GRPS | SGT | ACD | FC | CAHARRD | HNMG | SGT | CT | ITREDR | GGP | PEDEQ | HP | PK | SDVE | 1356 |
| Mesocricetus_auratus_TET2          | PRRKEK | GDGPEEKK | ESHQNI | ST    | MAPT  | YKKA  | APDAFNNQ | VEYHAP | CRGK | GRPS | SGT | ACD | FC | CAHARRD | HNMG | SGT | CT | ITREDR | GGP | PEDEQ | HP | PK | SDVE | 1365 |
| Bos_taurus_TET2                    | PRRKEK | GDGPEEKK | ESHQNI | ST    | MAPT  | YKKA  | APDAFNNQ | VEYHAP | CRGK | GRPS | SGT | ACD | FC | CAHARRD | HNMG | SGT | CT | ITREDR | GGP | PEDEQ | HP | PK | SDVE | 1365 |
| Capra_hircus_TET2                  | PRRKEK | GDGPEEKK | ESHQNI | ST    | MAPT  | YKKA  | APDAFNNQ | VEYHAP | CRGK | GRPS | SGT | ACD | FC | CAHARRD | HNMG | SGT | CT | ITREDR | GGP | PEDEQ | HP | PK | SDVE | 1375 |
| Ocotodon_degus_TET2                | PRRKEK | GDGPEEKK | ESHQNI | ST    | MAPT  | YKKA  | APDAFNNQ | VEYHAP | CRGK | GRPS | SGT | ACD | FC | CAHARRD | HNMG | SGT | CT | ITREDR | GGP | PEDEQ | HP | PK | SDVE | 1366 |
| Pantliopsis_hodgsonii_TET2         | PRRKEK | GDGPEEKK | ESHQNI | ST    | MAPT  | YKKA  | APDAFNNQ | VEYHAP | CRGK | GRPS | SGT | ACD | FC | CAHARRD | HNMG | SGT | CT | ITREDR | GGP | PEDEQ | HP | PK | SDVE | 1375 |
| Hetercephalus_glaber_TET2          | PRRKEK | GDGPEEKK | ESHQNI | ST    | MAPT  | YKKA  | APDAFNNQ | VEYHAP | CRGK | GRPS | SGT | ACD | FC | CAHARRD | HNMG | SGT | CT | ITREDR | GGP | PEDEQ | HP | PK | SDVE | 1337 |
| Rattus_norvegicus_TET2             | PRRKEK | GDGPEEKK | ESHQNI | ST    | MAPT  | YKKA  | APDAFNNQ | VEYHAP | CRGK | GRPS | SGT | ACD | FC | CAHARRD | HNMG | SGT | CT | ITREDR | GGP | PEDEQ | HP | PK | SDVE | 1333 |
| Mus_musculus_TET2                  | PRRKEK | GDGPEEKK | ESHQNI | ST    | MAPT  | YKKA  | APDAFNNQ | VEYHAP | CRGK | GRPS | SGT | ACD | FC | CAHARRD | HNMG | SGT | CT | ITREDR | GGP | PEDEQ | HP | PK | SDVE | 1322 |

Figure S6. Cont.



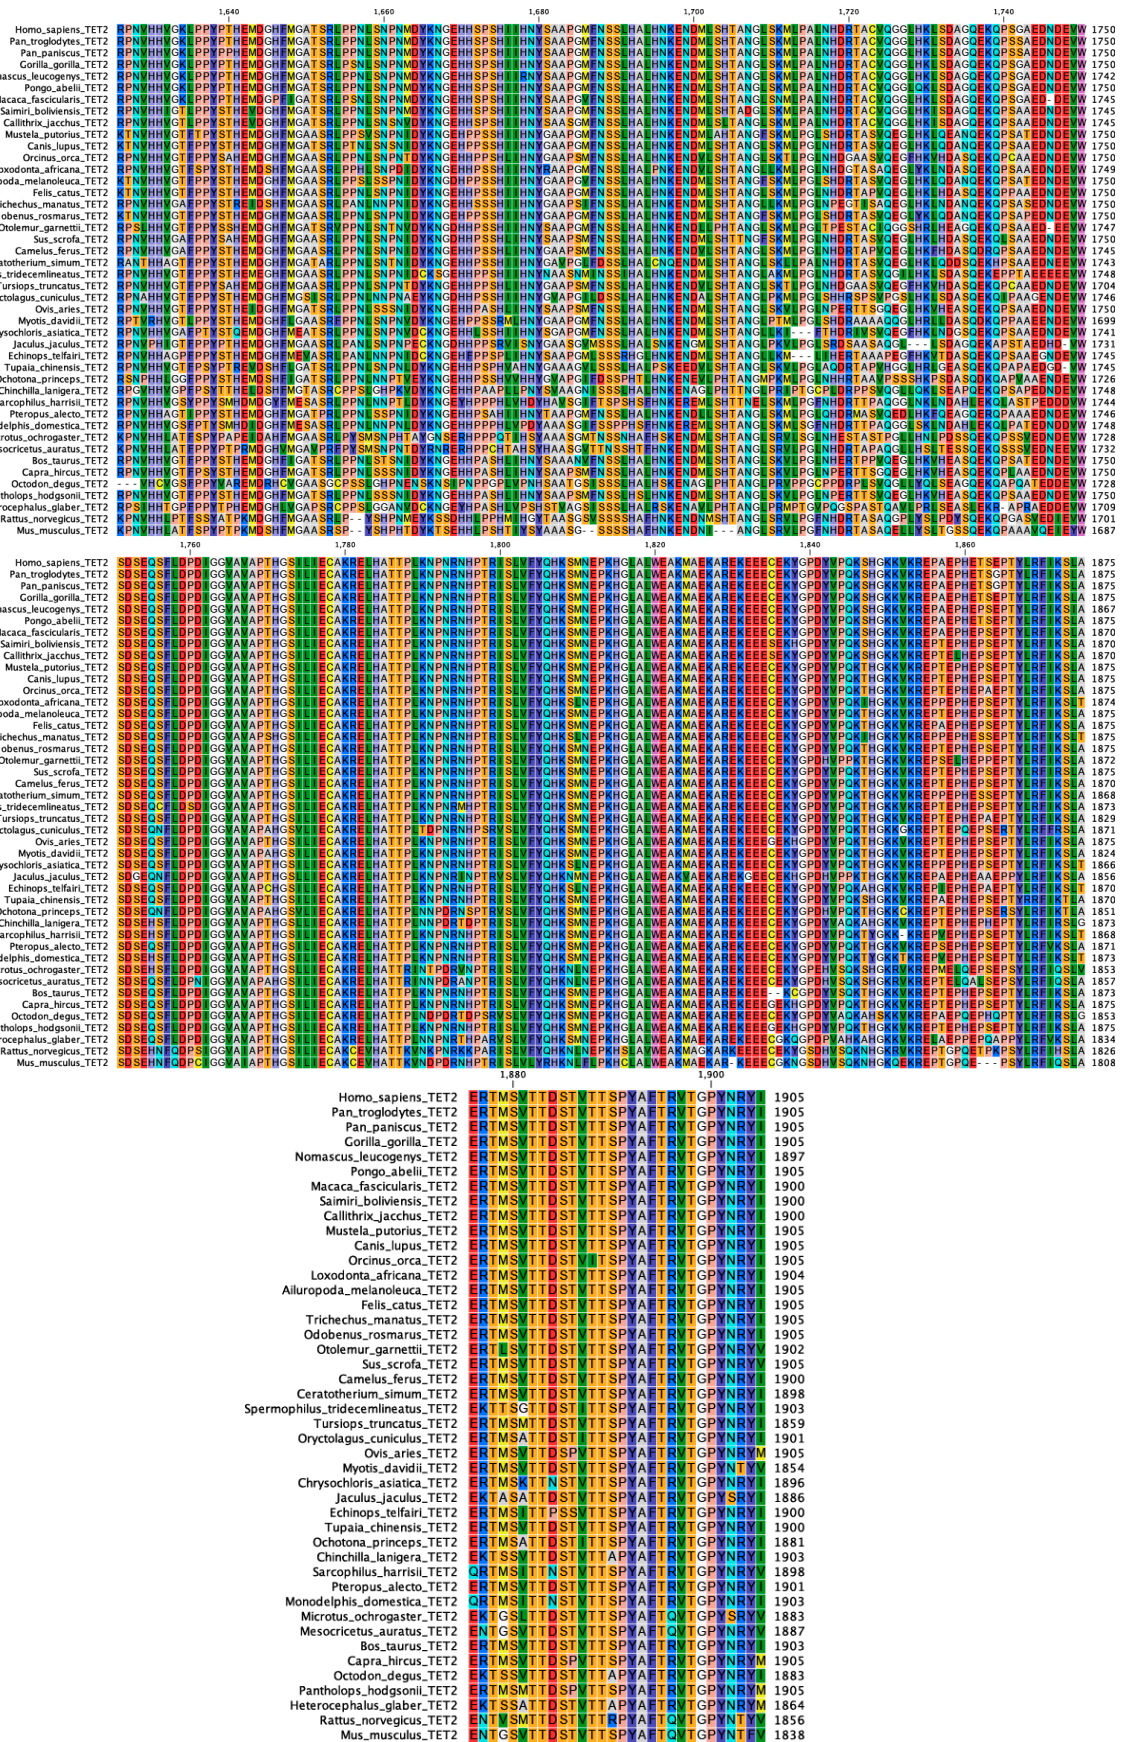

**Figure S6.** Multiple amino acid sequence alignment of mammalian TET2 genes. Amino acid sequences were aligned using MAFFT software with parameter settings optimized for FFT-NS-i. The resulting multiple sequence alignment was trimmed by removing poorly aligned regions, using trimAl 1.2.



|                                    | 30 | 40 | 50 | 60 | 70 | 80 | 90 | 100 | 110 | 120 |
|------------------------------------|----|----|----|----|----|----|----|-----|-----|-----|
| Homo_sapiens_TET3                  | M  | S  | D  | F  | P  | L  | A  | P   | P   | G   |
| Pongo_abelii_TET3                  | M  | S  | D  | F  | P  | L  | A  | P   | P   | G   |
| Macaca_fascicularis_TET3           | M  | S  | D  | F  | P  | L  | A  | P   | P   | G   |
| Canis_lupus_TET3                   | M  | S  | D  | F  | P  | L  | A  | P   | P   | G   |
| Felis_catus_TET3                   | M  | S  | D  | F  | P  | L  | A  | P   | P   | G   |
| Odobenus_rossmarus_TET3            | M  | S  | D  | F  | P  | L  | A  | P   | P   | G   |
| Equus_caballus_TET3                | M  | S  | D  | F  | P  | L  | A  | P   | P   | G   |
| Trichechus_manatus_TET3            | M  | S  | D  | F  | P  | L  | A  | P   | P   | G   |
| Chinchilla_lanigera_TET3           | M  | S  | D  | F  | P  | L  | A  | P   | P   | G   |
| Spermophilus_tridecemlineatus_TET3 | M  | S  | D  | F  | P  | L  | A  | P   | P   | G   |
| Lipotes_vexillifer_TET3            | M  | S  | D  | F  | P  | L  | A  | P   | P   | G   |
| Mustela_putorius_TET3              | M  | S  | D  | F  | P  | L  | A  | P   | P   | G   |
| Condylura_cristata_TET3            | M  | S  | D  | F  | P  | L  | A  | P   | P   | G   |
| Orcinus_orca_TET3                  | M  | S  | D  | F  | P  | L  | A  | P   | P   | G   |
| Bubalus_bubalis_TET3               | M  | S  | D  | F  | P  | L  | A  | P   | P   | G   |
| Panthera_tigris_TET3               | M  | S  | D  | F  | P  | L  | A  | P   | P   | G   |
| Ceratotherium_simum_TET3           | M  | S  | D  | F  | P  | L  | A  | P   | P   | G   |
| Leptonychotes_weddellii_TET3       | M  | S  | D  | F  | P  | L  | A  | P   | P   | G   |
| Chrysochloris_asiatca_TET3         | M  | S  | D  | F  | P  | L  | A  | P   | P   | G   |
| Balaenoptera_acutorostrata_TET3    | M  | S  | D  | F  | P  | L  | A  | P   | P   | G   |
| Bos_mutus_TET3                     | M  | S  | D  | F  | P  | L  | A  | P   | P   | G   |
| Sus_scrofa_TET3                    | M  | S  | D  | F  | P  | L  | A  | P   | P   | G   |
| Heterocephalus_glaber_TET3         | M  | S  | D  | F  | P  | L  | A  | P   | P   | G   |
| Octodon_degus_TET3                 | M  | S  | D  | F  | P  | L  | A  | P   | P   | G   |
| Rattus_norvegicus_TET3             | M  | S  | D  | F  | P  | L  | A  | P   | P   | G   |
| Myotis_brandtii_TET3               | M  | S  | D  | F  | P  | L  | A  | P   | P   | G   |
| Microtus_ochrogaster_TET3          | M  | S  | D  | F  | P  | L  | A  | P   | P   | G   |
| Vicugna_pacos_TET3                 | M  | S  | D  | F  | P  | L  | A  | P   | P   | G   |
| Mus_musculus_TET3                  | M  | S  | D  | F  | P  | L  | A  | P   | P   | G   |
| Mesocricetus_auratus_TET3          | M  | S  | D  | F  | P  | L  | A  | P   | P   | G   |
| Myotis_davidii_TET3                | M  | S  | D  | F  | P  | L  | A  | P   | P   | G   |
| Peromyscus_maniculatus_TET3        | M  | S  | D  | F  | P  | L  | A  | P   | P   | G   |
| Jaculus_jaculus_TET3               | M  | S  | D  | F  | P  | L  | A  | P   | P   | G   |
| Echinops_telfairi_TET3             | M  | S  | D  | F  | P  | L  | A  | P   | P   | G   |
| Ochotona_princeps_TET3             | M  | S  | D  | F  | P  | L  | A  | P   | P   | G   |
| Sorex_aramanus_TET3                | M  | S  | D  | F  | P  | L  | A  | P   | P   | G   |
| Elephantulus_edwardii_TET3         | M  | S  | D  | F  | P  | L  | A  | P   | P   | G   |
| Monodelphis_domestica_TET3         | M  | S  | D  | F  | P  | L  | A  | P   | P   | G   |

Figure S7. Cont.



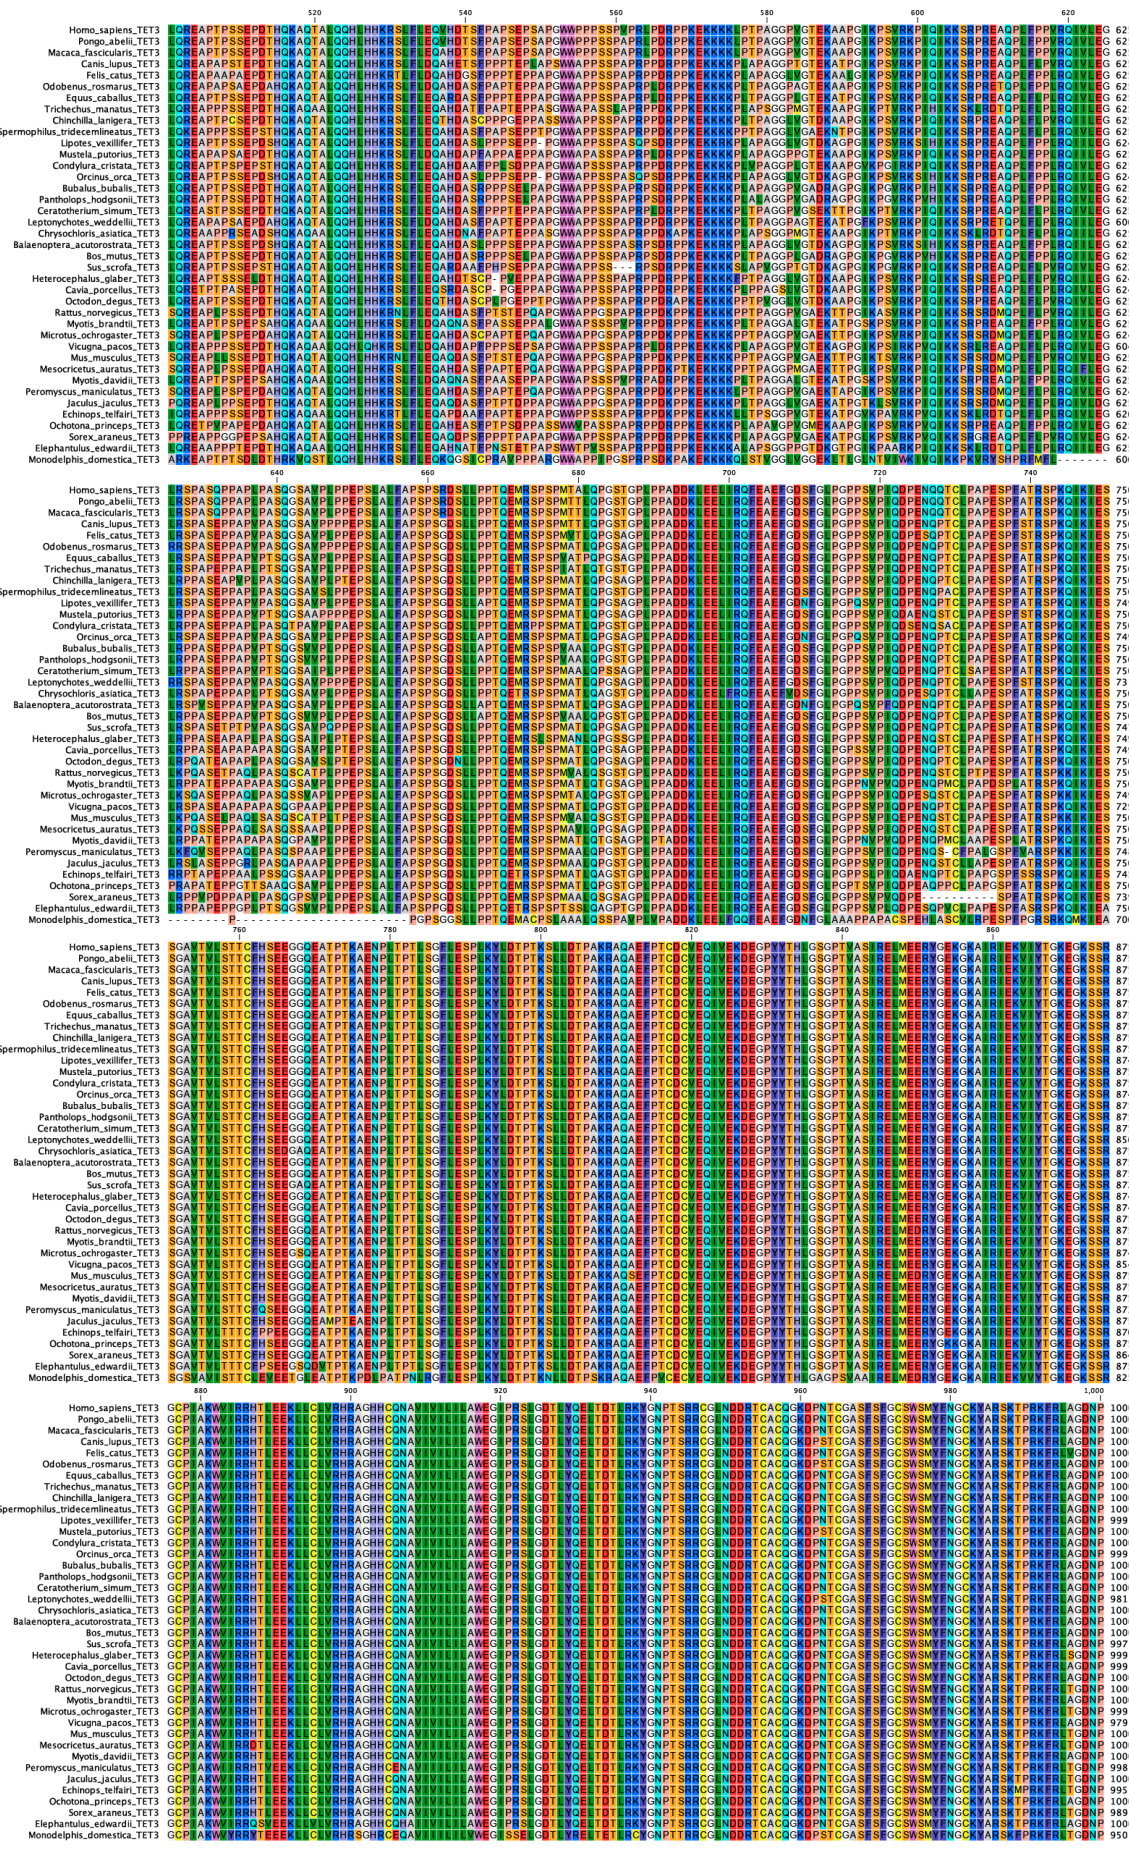

Figure S7. Cont.



|                                    | 1,020                                                                                                      | 1,040 | 1,060 | 1,080 | 1,100 | 1,120 |
|------------------------------------|------------------------------------------------------------------------------------------------------------|-------|-------|-------|-------|-------|
| Homo_sapiens_TET3                  | EEEEERKSFODIATEAPYKRRAPQAYQNTNEEAIDCRGKGRGPFAGTACMDGCAHARHKDHNLYNGCTCTIKEDNRGKPKPEDEQHPYKMASTDEGSEENAKTKGS |       |       |       |       | 1125  |
| Pongo_abelii_TET3                  | EEEEERKSFODIATEAPYKRRAPQAYQNTNEEAIDCRGKGRGPFAGTACMDGCAHARHKDHNLYNGCTCTIKEDNRGKPKPEDEQHPYKMASTDEGSEENAKTKGS |       |       |       |       | 1125  |
| Macaca_fascicularis_TET3           | EEEEERKSFODIATEAPYKRRAPQAYQNTNEEAIDCRGKGRGPFAGTACMDGCAHARHKDHNLYNGCTCTIKEDNRGKPKPEDEQHPYKMASTDEGSEENAKTKGS |       |       |       |       | 1125  |
| Canis_lupus_TET3                   | EEEEERKSFODIATEAPYKRRAPQAYQNTNEEAIDCRGKGRGPFAGTACMDGCAHARHKDHNLYNGCTCTIKEDNRGKPKPEDEQHPYKMASTDEGSEENAKTKGS |       |       |       |       | 1125  |
| Felis_catus_TET3                   | EEEEERKSFODIATEAPYKRRAPQAYQNTNEEAIDCRGKGRGPFAGTACMDGCAHARHKDHNLYNGCTCTIKEDNRGKPKPEDEQHPYKMASTDEGSEENAKTKGS |       |       |       |       | 1125  |
| Odobenus_rossmarus_TET3            | EEEEERKSFODIATEAPYKRRAPQAYQNTNEEAIDCRGKGRGPFAGTACMDGCAHARHKDHNLYNGCTCTIKEDNRGKPKPEDEQHPYKMASTDEGSEENAKTKGS |       |       |       |       | 1125  |
| Equus_caballus_TET3                | EEEEERKSFODIATEAPYKRRAPQAYQNTNEEAIDCRGKGRGPFAGTACMDGCAHARHKDHNLYNGCTCTIKEDNRGKPKPEDEQHPYKMASTDEGSEENAKTKGS |       |       |       |       | 1125  |
| Trichechus_manatus_TET3            | EEEEERKSFODIATEAPYKRRAPQAYQNTNEEAIDCRGKGRGPFAGTACMDGCAHARHKDHNLYNGCTCTIKEDNRGKPKPEDEQHPYKMASTDEGSEENAKTKGS |       |       |       |       | 1125  |
| Chinchilla_langera_TET3            | EEEEERKSFODIATEAPYKRRAPQAYQNTNEEAIDCRGKGRGPFAGTACMDGCAHARHKDHNLYNGCTCTIKEDNRGKPKPEDEQHPYKMASTDEGSEENAKTKGS |       |       |       |       | 1125  |
| Spermophilus_tridecemlineatus_TET3 | EEEEERKSFODIATEAPYKRRAPQAYQNTNEEAIDCRGKGRGPFAGTACMDGCAHARHKDHNLYNGCTCTIKEDNRGKPKPEDEQHPYKMASTDEGSEENAKTKGS |       |       |       |       | 1125  |
| Lipotes_vexillifer_TET3            | EEEEERKSFODIATEAPYKRRAPQAYQNTNEEAIDCRGKGRGPFAGTACMDGCAHARHKDHNLYNGCTCTIKEDNRGKPKPEDEQHPYKMASTDEGSEENAKTKGS |       |       |       |       | 1125  |
| Mustela_putorius_TET3              | EEEEERKSFODIATEAPYKRRAPQAYQNTNEEAIDCRGKGRGPFAGTACMDGCAHARHKDHNLYNGCTCTIKEDNRGKPKPEDEQHPYKMASTDEGSEENAKTKGS |       |       |       |       | 1125  |
| Condylura_cristata_TET3            | EEEEERKSFODIATEAPYKRRAPQAYQNTNEEAIDCRGKGRGPFAGTACMDGCAHARHKDHNLYNGCTCTIKEDNRGKPKPEDEQHPYKMASTDEGSEENAKTKGS |       |       |       |       | 1125  |
| Orcinus_orca_TET3                  | EEEEERKSFODIATEAPYKRRAPQAYQNTNEEAIDCRGKGRGPFAGTACMDGCAHARHKDHNLYNGCTCTIKEDNRGKPKPEDEQHPYKMASTDEGSEENAKTKGS |       |       |       |       | 1124  |
| Bubalus_bubalis_TET3               | EEEEERKSFODIATEAPYKRRAPQAYQNTNEEAIDCRGKGRGPFAGTACMDGCAHARHKDHNLYNGCTCTIKEDNRGKPKPEDEQHPYKMASTDEGSEENAKTKGS |       |       |       |       | 1125  |
| Pantholops_hodgsonii_TET3          | EEEEERKSFODIATEAPYKRRAPQAYQNTNEEAIDCRGKGRGPFAGTACMDGCAHARHKDHNLYNGCTCTIKEDNRGKPKPEDEQHPYKMASTDEGSEENAKTKGS |       |       |       |       | 1125  |
| Ceratotherium_simum_TET3           | EEEEERKSFODIATEAPYKRRAPQAYQNTNEEAIDCRGKGRGPFAGTACMDGCAHARHKDHNLYNGCTCTIKEDNRGKPKPEDEQHPYKMASTDEGSEENAKTKGS |       |       |       |       | 1125  |
| Leptonychotes_weddelii_TET3        | EEEEERKSFODIATEAPYKRRAPQAYQNTNEEAIDCRGKGRGPFAGTACMDGCAHARHKDHNLYNGCTCTIKEDNRGKPKPEDEQHPYKMASTDEGSEENAKTKGS |       |       |       |       | 1125  |
| Chrysoloris_asiatia_TET3           | EEEEERKSFODIATEAPYKRRAPQAYQNTNEEAIDCRGKGRGPFAGTACMDGCAHARHKDHNLYNGCTCTIKEDNRGKPKPEDEQHPYKMASTDEGSEENAKTKGS |       |       |       |       | 1125  |
| Balaenoptera_acutorostrata_TET3    | EEEEERKSFODIATEAPYKRRAPQAYQNTNEEAIDCRGKGRGPFAGTACMDGCAHARHKDHNLYNGCTCTIKEDNRGKPKPEDEQHPYKMASTDEGSEENAKTKGS |       |       |       |       | 1125  |
| Bos_mustus_TET3                    | EEEEERKSFODIATEAPYKRRAPQAYQNTNEEAIDCRGKGRGPFAGTACMDGCAHARHKDHNLYNGCTCTIKEDNRGKPKPEDEQHPYKMASTDEGSEENAKTKGS |       |       |       |       | 1122  |
| Sus_scrofa_TET3                    | EEEEERKSFODIATEAPYKRRAPQAYQNTNEEAIDCRGKGRGPFAGTACMDGCAHARHKDHNLYNGCTCTIKEDNRGKPKPEDEQHPYKMASTDEGSEENAKTKGS |       |       |       |       | 1122  |
| Heterocephalus_glaber_TET3         | EEEEERKSFODIATEAPYKRRAPQAYQNTNEEAIDCRGKGRGPFAGTACMDGCAHARHKDHNLYNGCTCTIKEDNRGKPKPEDEQHPYKMASTDEGSEENAKTKGS |       |       |       |       | 1124  |
| Cavia_porcellus_TET3               | EEEEERKSFODIATEAPYKRRAPQAYQNTNEEAIDCRGKGRGPFAGTACMDGCAHARHKDHNLYNGCTCTIKEDNRGKPKPEDEQHPYKMASTDEGSEENAKTKGS |       |       |       |       | 1124  |
| Octodon_degus_TET3                 | EEEEERKSFODIATEAPYKRRAPQAYQNTNEEAIDCRGKGRGPFAGTACMDGCAHARHKDHNLYNGCTCTIKEDNRGKPKPEDEQHPYKMASTDEGSEENAKTKGS |       |       |       |       | 1124  |
| Rattus_norvegicus_TET3             | EEEEERKSFODIATEAPYKRRAPQAYQNTNEEAIDCRGKGRGPFAGTACMDGCAHARHKDHNLYNGCTCTIKEDNRGKPKPEDEQHPYKMASTDEGSEENAKTKGS |       |       |       |       | 1125  |
| Myotis_brandti_TET3                | EEEEERKSFODIATEAPYKRRAPQAYQNTNEEAIDCRGKGRGPFAGTACMDGCAHARHKDHNLYNGCTCTIKEDNRGKPKPEDEQHPYKMASTDEGSEENAKTKGS |       |       |       |       | 1125  |
| Microtus_ochrogaster_TET3          | EEEEERKSFODIATEAPYKRRAPQAYQNTNEEAIDCRGKGRGPFAGTACMDGCAHARHKDHNLYNGCTCTIKEDNRGKPKPEDEQHPYKMASTDEGSEENAKTKGS |       |       |       |       | 1125  |
| Viucugna_pacos_TET3                | EEEEERKSFODIATEAPYKRRAPQAYQNTNEEAIDCRGKGRGPFAGTACMDGCAHARHKDHNLYNGCTCTIKEDNRGKPKPEDEQHPYKMASTDEGSEENAKTKGS |       |       |       |       | 1104  |
| Mus_musculus_TET3                  | EEEEERKSFODIATEAPYKRRAPQAYQNTNEEAIDCRGKGRGPFAGTACMDGCAHARHKDHNLYNGCTCTIKEDNRGKPKPEDEQHPYKMASTDEGSEENAKTKGS |       |       |       |       | 1104  |
| Mesocricetus_aureatus_TET3         | EEEEERKSFODIATEAPYKRRAPQAYQNTNEEAIDCRGKGRGPFAGTACMDGCAHARHKDHNLYNGCTCTIKEDNRGKPKPEDEQHPYKMASTDEGSEENAKTKGS |       |       |       |       | 1125  |
| Myotis_davidi_TET3                 | EEEEERKSFODIATEAPYKRRAPQAYQNTNEEAIDCRGKGRGPFAGTACMDGCAHARHKDHNLYNGCTCTIKEDNRGKPKPEDEQHPYKMASTDEGSEENAKTKGS |       |       |       |       | 1125  |
| Peromyscus_maniculatus_TET3        | EEEEERKSFODIATEAPYKRRAPQAYQNTNEEAIDCRGKGRGPFAGTACMDGCAHARHKDHNLYNGCTCTIKEDNRGKPKPEDEQHPYKMASTDEGSEENAKTKGS |       |       |       |       | 1123  |
| Jaculus_jaculus_TET3               | EEEEERKSFODIATEAPYKRRAPQAYQNTNEEAIDCRGKGRGPFAGTACMDGCAHARHKDHNLYNGCTCTIKEDNRGKPKPEDEQHPYKMASTDEGSEENAKTKGS |       |       |       |       | 1125  |
| Echinops_teffairi_TET3             | EEEEERKSFODIATEAPYKRRAPQAYQNTNEEAIDCRGKGRGPFAGTACMDGCAHARHKDHNLYNGCTCTIKEDNRGKPKPEDEQHPYKMASTDEGSEENAKTKGS |       |       |       |       | 1125  |
| Ochotona_princeps_TET3             | EEEEERKSFODIATEAPYKRRAPQAYQNTNEEAIDCRGKGRGPFAGTACMDGCAHARHKDHNLYNGCTCTIKEDNRGKPKPEDEQHPYKMASTDEGSEENAKTKGS |       |       |       |       | 1125  |
| Sorex_araneus_TET3                 | EEEEERKSFODIATEAPYKRRAPQAYQNTNEEAIDCRGKGRGPFAGTACMDGCAHARHKDHNLYNGCTCTIKEDNRGKPKPEDEQHPYKMASTDEGSEENAKTKGS |       |       |       |       | 1114  |
| Elephantulus_edwardi_TET3          | EEEEERKSFODIATEAPYKRRAPQAYQNTNEEAIDCRGKGRGPFAGTACMDGCAHARHKDHNLYNGCTCTIKEDNRGKPKPEDEQHPYKMASTDEGSEENAKTKGS |       |       |       |       | 1075  |
| Monodelphis_domestica_TET3         | EEEEERKSFODIATEAPYKRRAPQAYQNTNEEAIDCRGKGRGPFAGTACMDGCAHARHKDHNLYNGCTCTIKEDNRGKPKPEDEQHPYKMASTDEGSEENAKTKGS |       |       |       |       | 1075  |

Figure S7. Cont.



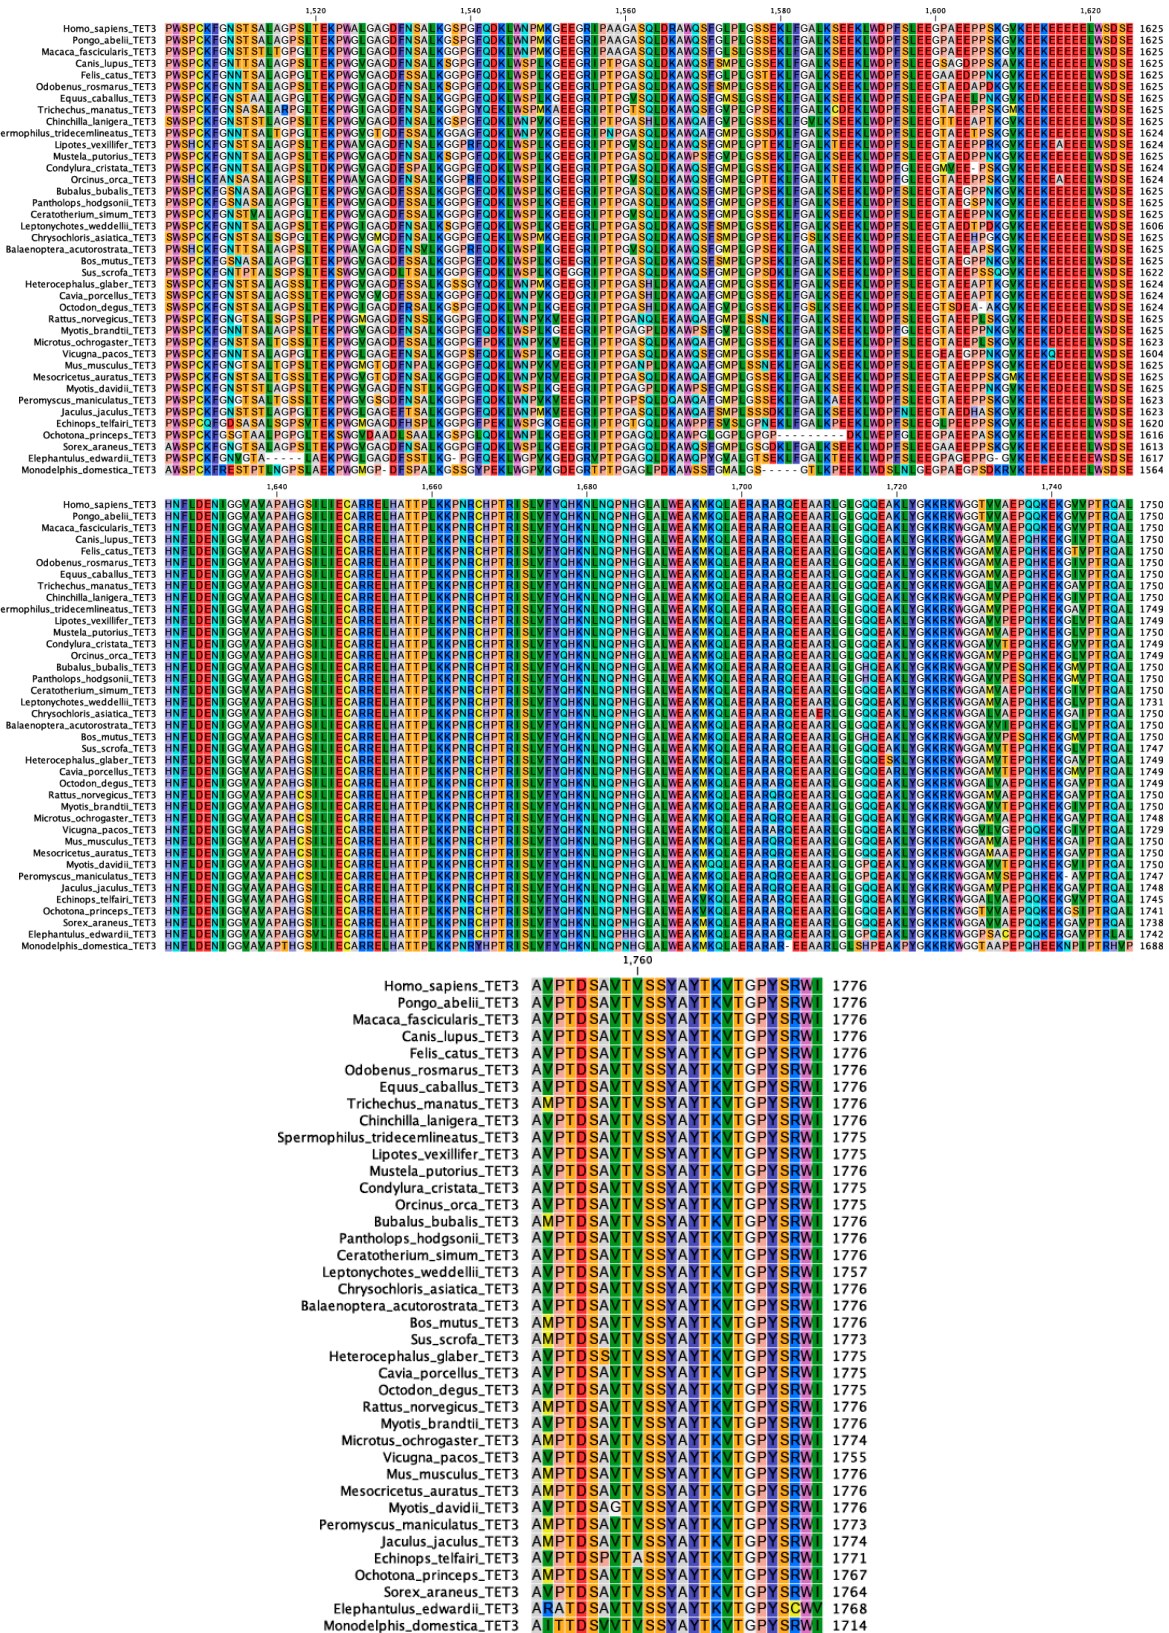

**Figure S7.** Multiple amino acid sequence alignment of mammalian TET3 genes. Amino acid sequences were aligned using MAFFT software with parameter settings optimized for FFT-NS-i. The resulting multiple sequence alignment was trimmed by removing poorly aligned regions, using trimAl 1.2.

**Table S1.** The TET genes used in this study.

| <b>Gene Name</b>                          | <b>Accession Number</b> |
|-------------------------------------------|-------------------------|
| <i>Homo_sapiens_TET1</i>                  | NM_030625               |
| <i>Pan_troglodytes_TET1</i>               | XM_507822               |
| <i>Gorilla_gorilla_TET1</i>               | XM_004049504            |
| <i>Pongo_abelii_TET1</i>                  | XM_002820885            |
| <i>Nomascus_leucogenys_TET1</i>           | ENSNLEG00000011782      |
| <i>Macaca_fascicularis_TET1</i>           | XM_005565691            |
| <i>Papio_anubis_TET1</i>                  | XM_003903859            |
| <i>Callithrix_jacchus_TET1</i>            | XM_002756304            |
| <i>Saimiri_boliviensis_TET1</i>           | XM_003928779            |
| <i>Ceratotherium_simum_TET1</i>           | XM_004427056            |
| <i>Canis_lupus_TET1</i>                   | XM_536371               |
| <i>Felis_catus_TET1</i>                   | ENSFCAG00000012673      |
| <i>Ailuropoda_melanoleuca_TET1</i>        | ENSAMEG00000018009      |
| <i>Pteropus_alecto_TET1</i>               | KB030800                |
| <i>Odobenus_rosmarus_TET1</i>             | XM_004393695            |
| <i>Orcinus_orca_TET1</i>                  | XM_004280811            |
| <i>Trichechus_manatus_TET1</i>            | XM_004386395            |
| <i>Camelus_ferus_TET1</i>                 | XM_006181184            |
| <i>Vicugna_pacos_TET1</i>                 | XM_006212904            |
| <i>Capra_hircus_TET1</i>                  | XM_005699119            |
| <i>Loxodonta_africana_TET1</i>            | XM_003409297            |
| <i>Ovis_aries_TET1</i>                    | XM_004021627            |
| <i>Dasypus_novemcinctus_TET1</i>          | XM_004470524            |
| <i>Mustela_putorius_TET1</i>              | XM_004795559            |
| <i>Sus_scrofa_TET1</i>                    | KC137683.1              |
| <i>Tupaia_chinensis_TET1</i>              | XM_006148936            |
| <i>Condylura_cristata_TET1</i>            | XM_004680833            |
| <i>Oryctolagus_cuniculus_TET1</i>         | XM_002718452            |
| <i>Otolemur_garnettii_TET1</i>            | XM_003783761            |
| <i>Spermophilus_tridecemlineatus_TET1</i> | XM_005325968            |
| <i>Myotis_brandtii_TET1</i>               | XM_005876807            |
| <i>Heterocephalus_glaber_TET1</i>         | XM_004888511            |
| <i>Echinops_telfairi_TET1</i>             | XM_004701383            |
| <i>Jaculus_jaculus_TET1</i>               | XM_004657793            |
| <i>Cavia_porcellus_TET1</i>               | XM_003473584            |
| <i>Ictidomys_tridecemlineatus_TET1</i>    | ENSSTOG00000001527      |
| <i>Rattus_norvegicus_TET1</i>             | XM_006223879            |
| <i>Mus_musculus_TET1</i>                  | NM_001253857            |
| <i>Mesocricetus_auratus_TET1</i>          | XM_005070904            |
| <i>Microtus_ochrogaster_TET1</i>          | XM_005360115            |
| <i>Panthera_tigris_TET1</i>               | XM_007095756            |
| <i>Balaenoptera_acutorostrata_TET1</i>    | XM_007167787            |
| <i>Leptonychotes_weddellii_TET1</i>       | XM_006728898            |
| <i>Physeter_catodon_TET1</i>              | XM_007121056            |
| <i>Bubalus_bubalis_TET1</i>               | XM_006070286            |
| <i>Chrysochloris_asiatica_TET1</i>        | XM_006835832            |
| <i>Myotis_davidii_TET1</i>                | XM_006760999            |
| <i>Homo_sapiens_TET2</i>                  | NM_001127208            |
| <i>Pan_troglodytes_TET2</i>               | XM_003310400            |



Table S1. Cont.

| Gene Name                                 | Accession Number   |
|-------------------------------------------|--------------------|
| <i>Pan_paniscus_TET2</i>                  | XM_003829967       |
| <i>Gorilla_gorilla_TET2</i>               | XM_004040224       |
| <i>Nomascus_leucogenys_TET2</i>           | ENSNLEG00000013289 |
| <i>Pongo_abelii_TET2</i>                  | XM_002815025       |
| <i>Macaca_fascicularis_TET2</i>           | XM_005555594       |
| <i>Saimiri_boliviensis_TET2</i>           | XM_003929494       |
| <i>Callithrix_jacchus_TET2</i>            | XM_002745526       |
| <i>Mustela_putorius_TET2</i>              | XM_004748137       |
| <i>Canis_lupus_TET2</i>                   | XM_535678          |
| <i>Orcinus_orca_TET2</i>                  | XM_004269617       |
| <i>Loxodonta_africana_TET2</i>            | XM_003410366       |
| <i>Ailuropoda_melanoleuca_TET2</i>        | XM_002926670       |
| <i>Felis_catus_TET2</i>                   | XM_006930937       |
| <i>Trichechus_manatus_TET2</i>            | XM_004380202       |
| <i>Odobenus_rosmarus_TET2</i>             | XM_004401875       |
| <i>Otolemur_garnettii_TET2</i>            | XM_003796334       |
| <i>Sus_scrofa_TET2</i>                    | XM_003129278       |
| <i>Camelus_ferus_TET2</i>                 | XM_006184616       |
| <i>Ceratotherium_simum_TET2</i>           | XM_004426613       |
| <i>Spermophilus_tridecemlineatus_TET2</i> | XM_005339807       |
| <i>Tursiops_truncatus_TET2</i>            | XM_004319793       |
| <i>Oryctolagus_cuniculus_TET2</i>         | XM_002717196       |
| <i>Ovis_aries_TET2</i>                    | XM_004009655       |
| <i>Myotis_davidii_TET2</i>                | XM_006778911       |
| <i>Chrysochloris_asiatica_TET2</i>        | XM_006874557       |
| <i>Jaculus_jaculus_TET2</i>               | XM_004662993       |
| <i>Echinops_telfairi_TET2</i>             | XM_004703292       |
| <i>Tupaia_chinensis_TET2</i>              | XM_006151157       |
| <i>Ochotona_princeps_TET2</i>             | XM_004594282       |
| <i>Chinchilla_lanigera_TET2</i>           | XM_005406228       |
| <i>Sarcophilus_harrisii_TET2</i>          | XM_003772926       |
| <i>Pteropus_alecto_TET2</i>               | KB031030           |
| <i>Monodelphis_domestica_TET2</i>         | XM_003341383       |
| <i>Microtus_ochrogaster_TET2</i>          | XM_005357312       |
| <i>Mesocricetus_auratus_TET2</i>          | XM_005081981       |
| <i>Bos_taurus_TET2</i>                    | XM_001790146       |
| <i>Capra_hircus_TET2</i>                  | XM_005681343       |
| <i>Octodon_degus_TET2</i>                 | XM_004626707       |
| <i>Pantholops_hodgsonii_TET2</i>          | XM_005978869       |
| <i>Heterocephalus_glaber_TET2</i>         | XM_004866253       |
| <i>Rattus_norvegicus_TET2</i>             | XM_001077411       |
| <i>Mus_musculus_TET2</i>                  | NM_001040400       |
| <i>Homo_sapiens_TET3</i>                  | NM_001287491       |
| <i>Pongo_abelii_TET3</i>                  | ENSPPYG00000012286 |
| <i>Macaca_fascicularis_TET3</i>           | XM_005575570       |
| <i>Canis_lupus_TET3</i>                   | XM_005630554       |
| <i>Felis_catus_TET3</i>                   | XM_003984133       |
| <i>Odobenus_rosmarus_TET3</i>             | XM_004398707       |
| <i>Equus_caballus_TET3</i>                | XM_001917114       |
| <i>Trichechus_manatus_TET3</i>            | XM_004369189       |

Table S1. Cont.

| Gene Name                                 | Accession Number |
|-------------------------------------------|------------------|
| <i>Chinchilla lanigera_TET3</i>           | XM_005385530     |
| <i>Spermophilus tridecemlineatus_TET3</i> | XM_005329351     |
| <i>Lipotes vexillifer_TET3</i>            | XM_007459392     |
| <i>Mustela putorius_TET3</i>              | XM_004742217     |
| <i>Condylura cristata_TET3</i>            | XM_004691540     |
| <i>Orcinus orca_TET3</i>                  | XM_004277087     |
| <i>Bubalus bubalis_TET3</i>               | XM_006045954     |
| <i>Pantholops hodgsonii_TET3</i>          | XM_005962644     |
| <i>Ceratotherium simum_TET3</i>           | XM_004435517     |
| <i>Leptonychotes weddellii_TET3</i>       | XM_006735303     |
| <i>Chrysochloris asiatica_TET3</i>        | XM_006872404     |
| <i>Balaenoptera acutorostrata_TET3</i>    | XM_007189011     |
| <i>Bos mutus_TET3</i>                     | XM_005897644     |
| <i>Sus scrofa_TET3</i>                    | XM_005662450     |
| <i>Heterocephalus glaber_TET3</i>         | XM_004844710     |
| <i>Cavia porcellus_TET3</i>               | XM_005003343     |
| <i>Octodon degus_TET3</i>                 | XM_004634101     |
| <i>Rattus norvegicus_TET3</i>             | XM_006224966     |
| <i>Myotis brandtii_TET3</i>               | XM_005869422     |
| <i>Microtus ochrogaster_TET3</i>          | XM_005364657     |
| <i>Vicugna pacos_TET3</i>                 | XM_006218996     |
| <i>Mus musculus_TET3</i>                  | XM_006505773     |
| <i>Mesocricetus auratus_TET3</i>          | XM_005071053     |
| <i>Myotis davidii_TET3</i>                | XM_006760024     |
| <i>Peromyscus maniculatus_TET3</i>        | XM_006994349     |
| <i>Jaculus jaculus_TET3</i>               | XM_004668275     |
| <i>Echinops telfairi_TET3</i>             | XM_004696098     |
| <i>Ochotona princeps_TET3</i>             | XM_004590675     |
| <i>Sorex araneus_TET3</i>                 | XM_004619988     |
| <i>Elephantulus edwardii_TET3</i>         | XM_006880851     |
| <i>Monodelphis_TET3</i>                   | XM_007477889     |
